# Supplementary material for: HLA and autoantibodies define scleroderma subtypes and risk in African and European Americans and suggest a role for molecular mimicry
Source: PubMed Central journal article supplement — Proc Natl Acad Sci U S A. 2019 Dec 23;117(1):552–62. doi: 10.1073/pnas.1906593116 (PMC6955366; doi:10.1073/pnas.1906593116), 2019-12-23
Supplement: pnas.1906593116.sapp.pdf [file pnas.1906593116.sapp.pdf]

## Supplementary Information for

### ***HLA* and antibodies define scleroderma subtypes and risk in African and European Americans and suggest a role for molecular mimicry**

Pravitt Gourh, Sarah A Safran, Theresa Alexander, Steven E Boyden, Nadia D Morgan, Ami A Shah, Maureen D Mayes, Ayo Doumateye, Amy R Bentley, Daniel Shriner, Robyn T Domsic, Thomas A Medsger Jr, Paula S Ramos, Richard M Silver, Virginia D Steen, John Varga, Vivien Hsu, Lesley Ann Saketkoo, Elena Schioppa, Dinesh Khanna, Jessica K Gordon, Brynn Kron, Lindsey A Criswell, Heather Gladue, Chris T Derk, Elana J Bernstein, S Louis Bridges Jr, Victoria K Shanmugam, Kathleen D Kolstad, Lorinda Chung, Suzanne Kafaja, Reem Jan, Marcin Trojanowski, Avram Goldberg, Benjamin D Korman, Peter J Steinbach, Settara C Chandrasekharappa, James C Mullikin, Adebawale Adeyemo, Charles Rotimi, Fredrick M Wigley, Daniel L Kastner, Francesco Boin, and Elaine F Remmers

Pravitt Gourh, MD  
E-mail: pravitt.gourh@nih.gov

Daniel L Kastner, MD PhD  
E-mail: kastnerd@mail.nih.gov

#### **This PDF file includes:**

Supplementary text  
Figs. S1 to S9  
Tables S1 to S15  
References for SI reference citations

## Supporting Information Text

### Supplemental Materials and Methods

**African American cases and controls.** AA patients with SSc were enrolled in the GRASP consortium from 23 academic centers in the US.

#### GRASP Centers

- National Human Genome Research Institute (NHGRI) & National Institute of Arthritis and Musculoskeletal and Skin Diseases (NIAMS), National Institutes of Health (NIH)
- Johns Hopkins University
- University of Texas-Houston
- University of Pittsburgh
- Georgetown University
- Medical University of South Carolina
- Northwestern University
- University of Michigan
- Rutgers University
- Hospital for Special Surgery, Cornell University
- Tulane University
- Emory University
- University of California San Francisco
- University of Pennsylvania
- University of Alabama at Birmingham
- George Washington University
- Stanford University
- University of Chicago
- Columbia University
- New York University
- Boston University
- University of California Los Angeles
- Henry Ford Hospital, Detroit, Michigan
- University of Rochester

Only unrelated individuals were included as controls. Sera obtained from controls were tested for antinuclear antibodies (ANAs) by indirect immunofluorescence, and only those with a titer of <1:80 were included in this study. DNA was extracted from samples of whole blood or saliva.

**Autoantibody Testing.** Sera from the AA SSc patients were tested by a line immunoassay for systemic sclerosis profile autoantibodies (Euroimmun Euroline profile kit, Lübeck, Germany). For the European ancestry SSc patients, reported autoantibody data was extracted from dbGaP accession phs000357.v1.p1. Out of the 115 patients who were ATA+ only 1 was positive for ACA. More globally, 468 of the 723 tested sera (65%) were positive for a SSc-specific autoantibody (ACA, ATA or ARA) and only 8 of those 468 (1.7%) were positive for two autoantigens.

**Genotyping.** The AA SSc cases and controls were genotyped with the Illumina Infinium Multi-Ethnic Global Array kit. All included samples had call rate greater than 95%. Markers with call rate less than 95%, minor allele frequency less than 0.01, or controls that deviated from Hardy-Weinberg equilibrium with  $P$  less than  $10^{-5}$  were excluded. High quality genotypes were imputed using the Michigan Imputation Server and the required 6,114 markers submitted to the HLA\*IMP:03 server for HLA imputation. The European ancestry samples were genotyped on Illumina Human610-Quadv1\_B chip and the same quality controls were executed separately on the genotypes from each study and then the samples were combined and only markers that were present in all the studies were retained. Samples were also checked for relatedness by an analysis of identity by descent of LD pruned ( $r^2 < 0.5$ ) genotypes and no pairs were allowed with pi-hat greater than 0.085.

**Principal Components Analysis (PCA).** For the two ancestral populations, PCA was used to evaluate the genetic similarity of the cases with the controls, to remove outliers, and to correct for residual dissimilarity separately. LD-pruned data were used to calculate the top ten principal components for each sample. Two dimensional plots of the PCs allowed removal of outliers. Two dimensional plots of the first two PCs of the cases and the controls included in each study are shown in Supplementary Figure S1.

### HLA Imputation.

**African American cases and controls.** We selected the HLA\*IMP:03 tool to perform *HLA* imputation in the AA samples, because it has a multi-ethnic reference panel of 10,561 individuals that includes 568 individuals of African ancestry (1). We extracted genotypes of 19,038 markers that passed quality control from the greater *MHC* region (chromosome 6: 20,000,000 – 40,000,000 on GRCh37/hg19) and used the Michigan Imputation Server to perform haplotype phasing and SNP imputation using Eagle and the 1000G Phase 3 v5 reference (2). We then submitted the phased genotypes of the required 6,114 markers to the HLA\*IMP:03 Server, which imputed two two-field (i.e., four-digit) classical *HLA* alleles of 11 *HLA* region genes for each individual. We used available whole exome sequence for 763 of the AA samples to determine their *HLA* alleles with a software tool that performs alignments to a population reference graph of the *HLA* region (HLA\*PRG:LA) allowing comparison of the HLA\*IMP:03 imputed alleles with the sequence based alleles (3).

**European American cases and controls.** We extracted genotypes of 2,690 SNPs that passed quality control in all the European ancestry datasets from the greater *MHC* region and used SNP2HLA and a mainly European ancestry reference of 5,225 individuals from the Type I Diabetes Consortium to impute classical *HLA* alleles and polymorphic amino acids of the *HLA* proteins (4).

**HLA Association and Conditional Analysis.** The HLA\*IMP:03 imputed alleles for each gene were recoded as individual markers, each with two presence or absence alleles (PP, PA, or AA), matching the SNP2HLA imputation output. Alleles with frequency less than 0.01 were omitted. For *HLA* allele association, a logistic regression analysis was performed under a dominant model, encoding AA genotypes=0 and AP and PP genotypes=1. A dominant model was applied for analysis of *HLA* alleles because it is consistent with the method classically used for identifying *HLA* alleles associated with different human diseases (5). It is also consistent with the importance of presence or absence of a molecule endowing capability to bind and present specific peptide antigens. Regressions were corrected for genetic dissimilarity between the cases and the controls by including the top 10 PCs as covariates. To account for strong LD in the region, independent associations were identified by performing conditional analysis and at each level the strongest association accepted, and the scan rerun with all the previous ‘accepted’ associations included as covariates. This was done until p-value statistical significance threshold was reached. The total number of classical *HLA* alleles tested for association were 138 in both the populations and there were 5 analysis conducted. Thus a Bonferroni’s multiple test corrected significance threshold of  $P < 0.000072$  was used for association analysis.

**Amino Acid Analysis.** For the HLA\*IMP:03 imputed data, the genotypes of all the polymorphic amino acids of the *HLA* proteins were extracted from the IPD-IMGT/*HLA* Database according to the two alleles specified for each imputed gene and each polymorphic amino acid marker was coded for absence or presence genotypes, AA, AP, or PP (6). The SNP2HLA output included similarly encoded P/A genotypes for each of the polymorphic amino acids. Amino acid associations with SSc were evaluated with a dominant model logistic regression analysis as done for the *HLA* alleles. Amino acids with frequency less than 0.01 were omitted. To account for strong LD in the region, independent associations were identified by performing conditional analysis and at each level the strongest association accepted, and the scan rerun with all the previous ‘accepted’ associations included as covariates. This was done until p-value statistical significance threshold was reached. The p-value threshold was set as  $P < 0.000013$  based on 800 amino acids tested across both population samples, multiplied by 5 sets of analysis.

**HLA Alpha-Beta Chain Pair Analysis.** The non-polymorphic *HLA-DR* alpha chain combines with *HLA-DRB1* alleles, thus disease-associated DR1 alpha/beta combinations are defined by the association of *DRB1* alleles. However, *HLA-DQ1* and *HLA-DP1* molecules have polymorphic alpha and beta chains, therefore the association of *DQA1/DQB1* and *DPA1/DPB1* allele pairs are relevant to disease association. To identify SSc-associated *HLA-DQ* and *-DP* alpha and beta chain pairs we performed haplotype association analysis of the *HLA-DQ* and *-DP* genotypes using Haploview and then created new P/A markers for the haplotypes that were analyzed by logistic regression (7).

**3D Protein Modeling.** Protein Data Bank entries 1a35 for topoisomerase I, 2ipx for fibrillarin, 3nqu for centromere protein A, 6atf for HLA-DR, 1s9v for HLA-DQ, and 3lqz for HLA-DP were obtained and UCSF chimera was used to model the individual amino acid positions. Molecular graphics and analyses performed with UCSF Chimera, developed by the Resource for Biocomputing, Visualization, and Informatics at the University of California, San Francisco, with support from NIH P41-GM103311 (8).

**CART Analysis.** Classification and Regression Tree (CART) analysis was performed to explore higher order interactions amongst the HLA alleles (CART 6.0, Salford Systems, San Diego, CA) (9). *HLA* alleles were used as nominal categorical variables to predict the outcome SSc. CART analysis interactively identifies the most powerful variable classifier for SSc and splits the variables into binary trees (presence/absence). The SSc-specific autoantibody subsets of SSc for both the AA and EA populations were analyzed individually and split into successive groups using ten-fold cross-validation and trees were pruned for significance at  $p$ -value ( $P$ ) $<0.001$  using Pearson's chi-square test or, when appropriate, Fisher's exact test.

**Identification of Immunodominant Peptides.** The HLA-II peptide groove is open at both ends, thus it can allow peptide binding of varying lengths (10). Predominantly, 13-25 residues long peptides have been found to bind HLA-II in nature with the most abundant having an average peptide length of 15 residues (11–16). Several previous studies have used 15-mer residues as the default peptide length for predicting peptides that will bind to HLA-II molecule (17–22). The default peptide length suggested for the NetMHCIIpan 3.2 server is a 15-mer peptide (23, 24). The NetMHCIIpan 3.2 server was used to predict the binding of 15-mer peptide sequences within the protein of interest (topoisomerase I, fibrillarin, or CENPA/CENPB) to the SSc-associated *MHC* Class II  $\alpha/\beta$  heterodimers within the respective autoantibody subsets. Peptides with a binding affinity  $\leq 500$ nM and observed in two of the SSc-associated *HLA*  $\alpha/\beta$  heterodimers were prioritized as immunodominant peptides (23). The identified peptides were sorted by affinity (IC<sub>50</sub> values). For each autoantibody subset, the resulting lists of peptide binders were analyzed for overlap in peptide sequences between the different *HLA* alleles, and peptide sequences were selected if they had moderate binding affinity for both the associated alleles. The prediction values are given as IC<sub>50</sub> values in nanomolar (nM). Strong binders are defined as peptides with a binding affinity less than or equal to 50 nM, and moderate binders are those with an affinity greater than 50 nM but less than or equal to 500 nM (23, 25–27).

**Molecular Mimicry.** The prioritized immunodominant peptide sequences were entered into the NCBI Basic Local Alignment Search Tool Standard Protein BLAST with the organism set to virus (taxid:10239) and human (taxid:9606) to identify homologous sequences in viral and human sequence databases, respectively. Significant homology was defined by an E-value  $< 0.05$  (28). To rule out homology by chance, one hundred 15-mer random sequence peptides were generated using ExPASy from the Swiss Institute of Bioinformatics (SIB) and Sequence Manipulation Suite and compared for homologous sequences in viral sequence database (29, 30). We used an arbitrarily selected 15-mer peptide from serum albumin comprising residues 152-166 as an additional comparator for self-antigen homology (31).

#### Web Addresses.

- dbGaP: <https://www.ncbi.nlm.nih.gov/gap>
- HLA-PRG-LA: <https://github.com/DiltheyLab/HLA-PRG-LA>
- Michigan Imputation Server: <https://imputationserver.sph.umich.edu/index.html>
- HLA\*IMP:03 Server: <http://imp.science.unimelb.edu.au/hla/>
- SNP2HLA: <http://software.broadinstitute.org/mpg/snp2hla/>
- The IPD-IMGT/HLA Database: <https://www.ebi.ac.uk/ipd/imgt/hla/>
- Haploview: <https://www.broadinstitute.org/haploview/haploview>
- NetMHCIIpan: <http://www.cbs.dtu.dk/services/NetMHCIIpan/>
- NCBI Protein Blast:  
[https://blast.ncbi.nlm.nih.gov/Blast.cgi?PROGRAM=blastp&PAGE\\_TYPE=BlastSearch&LINK\\_LOC=blasthome](https://blast.ncbi.nlm.nih.gov/Blast.cgi?PROGRAM=blastp&PAGE_TYPE=BlastSearch&LINK_LOC=blasthome)
- UCSF Chimera: <https://www.cgl.ucsf.edu/chimera/>
- Random Peptide generators: <https://web.expasy.org/randseq/>, [http://www.bioinformatics.org/sms2/random\\_protein.html](http://www.bioinformatics.org/sms2/random_protein.html)

African American samples  
662 SSc cases (blue), 946 ctrls (grey)

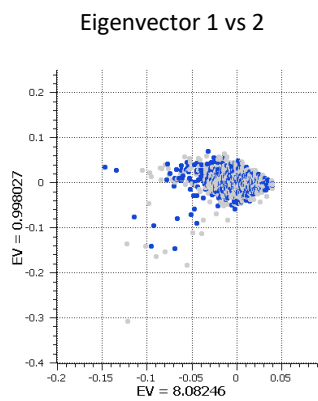

European American samples  
723 SSc cases (blue), 5,437 controls (grey)

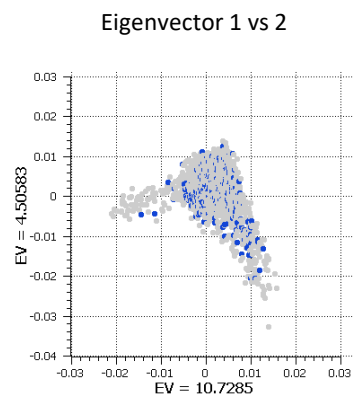

**Fig. S1.** Principal component analysis (PCA) plots of the African and European American SSc cases and controls included in the study. PCA was performed on LD-pruned data ( $r^2 < 0.5$ ).

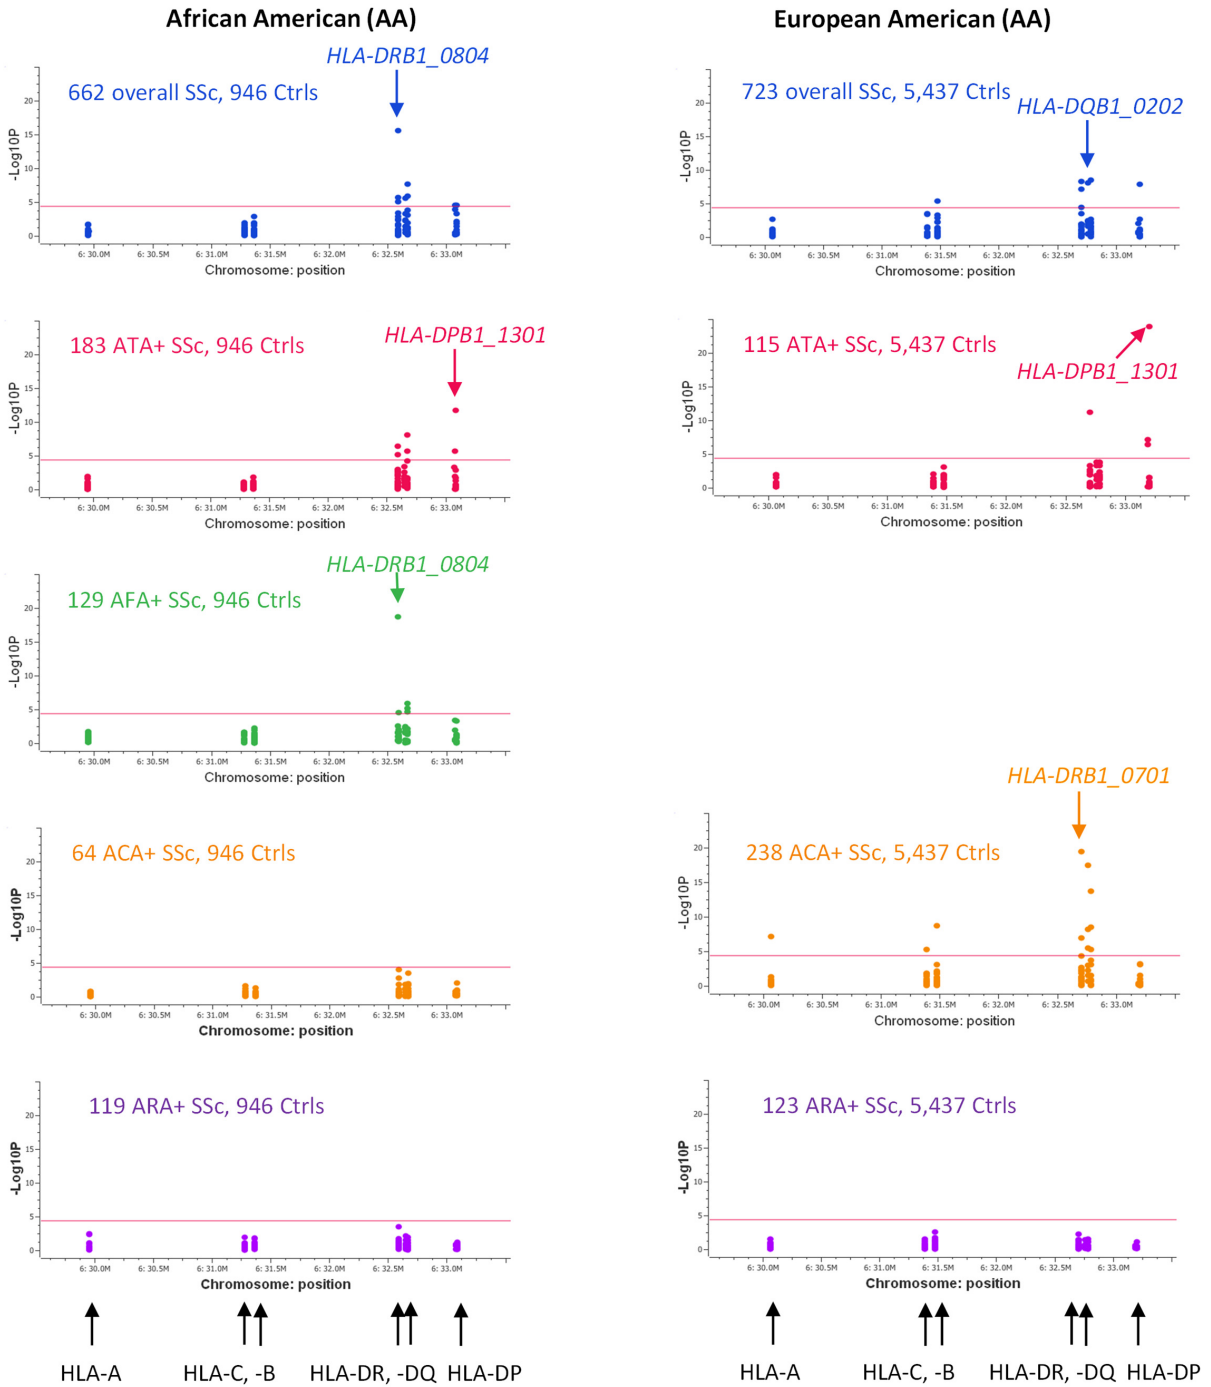

**Fig. S2.** Association of classical *HLA* alleles with SSc and autoantibody subsets of SSc in African and European Americans. *HLA* imputed classical allele associations in SSc and autoantibody subsets determined in African Americans (left panels) and European Americans (right panels). Common AA haplotype: *HLA-DRB1\*08:04/DQA1\*05:01/DQB1\*03:01*; Common EA haplotypes: *HLA-DRB1\*11:04/DQA1\*05:01/DQB1\*03:01* and *HLA-DRB1\*07:01/DQA1\*02:01/DQB1\*02:02*.

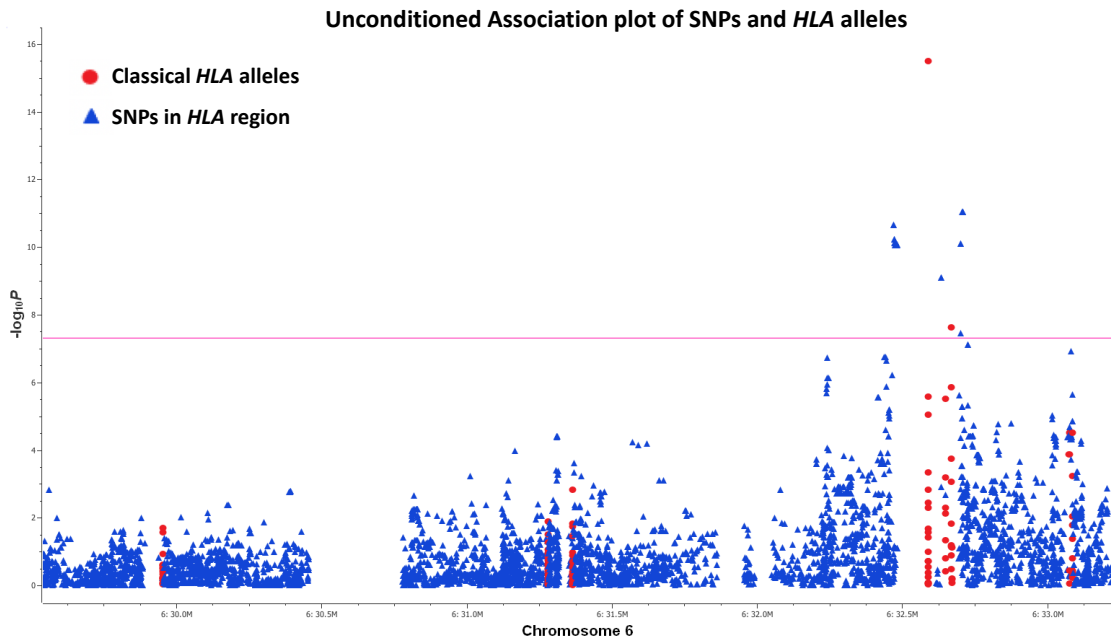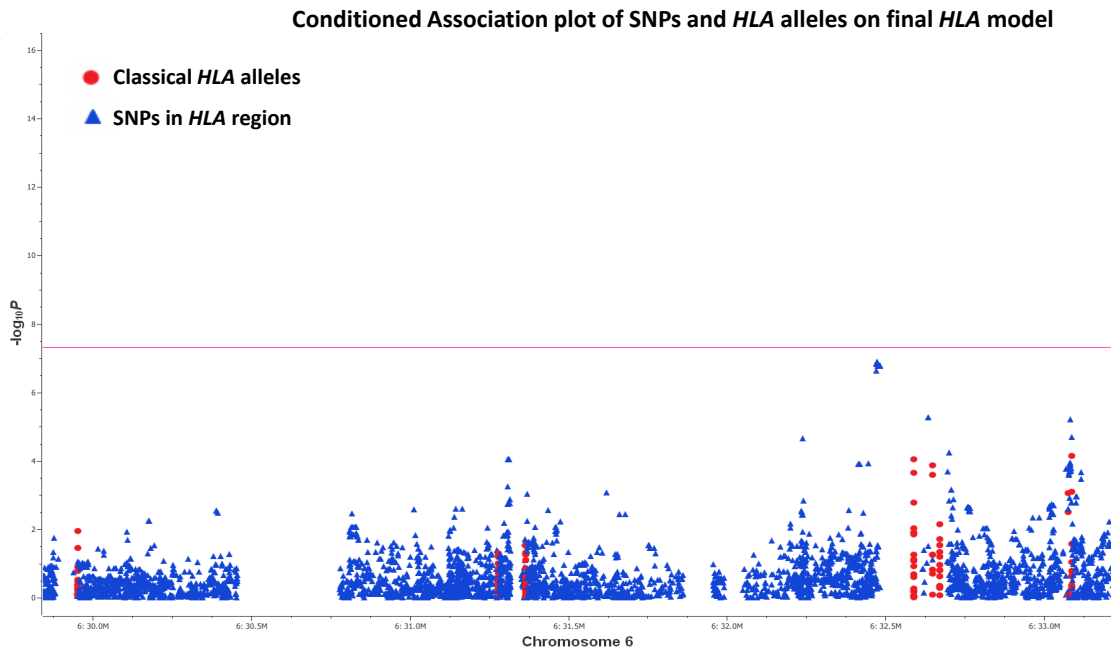

**Fig. S3.** Association Analysis in African Americans of the *HLA* region SNPs and Classical *HLA* alleles, both Unconditioned and Conditioned on the final *HLA* model, *HLA-DRB1\*08:04* and *HLA-DRB1\*11:02* alleles. Both analyses corrected for the top 10 Principal Components.

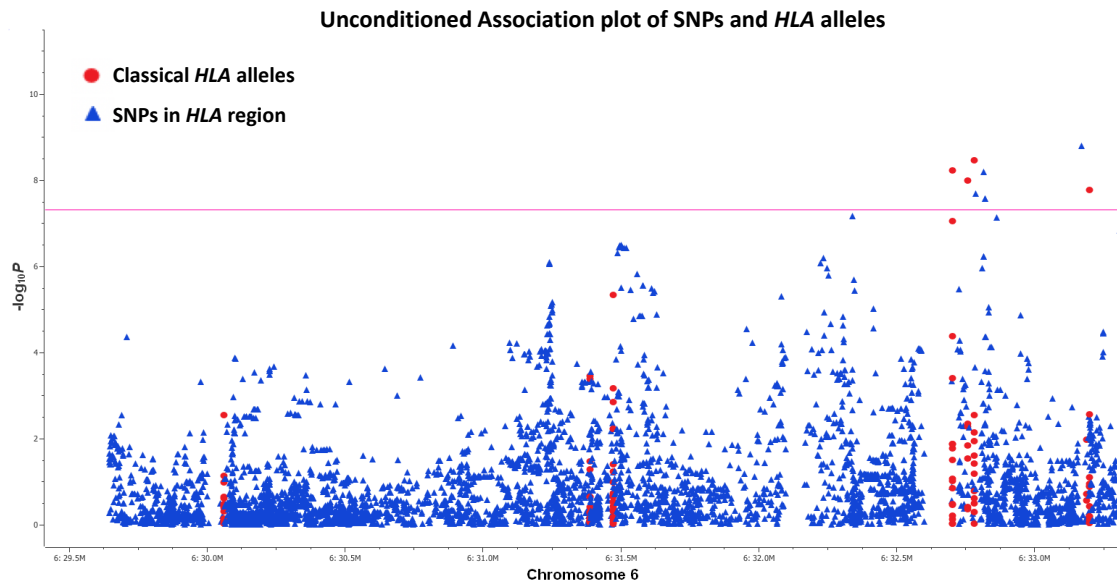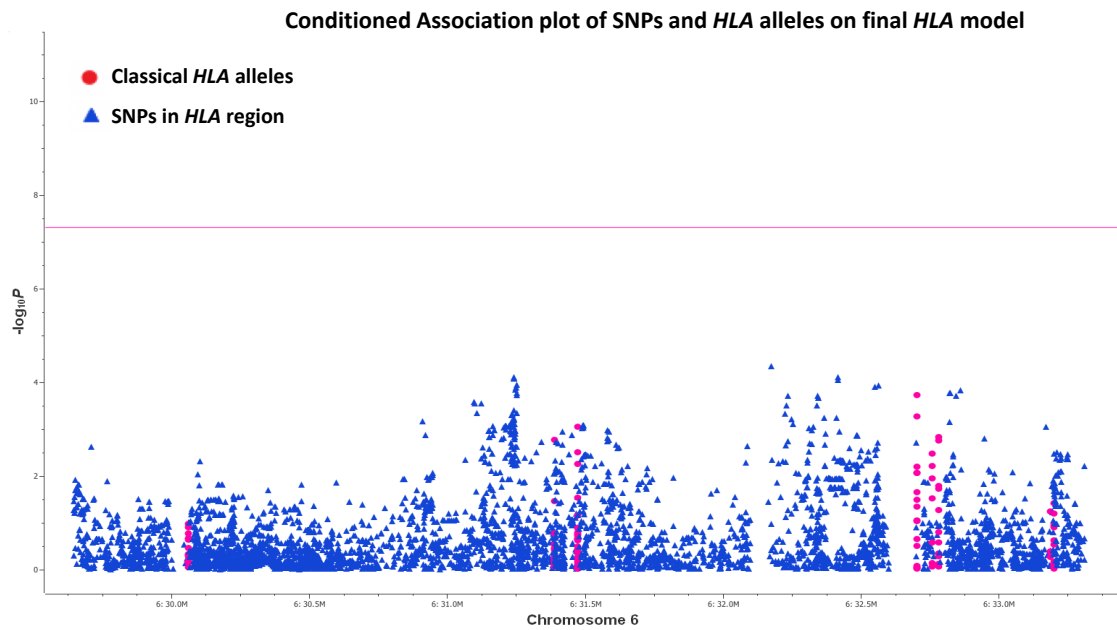

**Fig. S4.** Association Analysis in European Americans of the *HLA* region SNPs and Classical *HLA* alleles, both Unconditioned and Conditioned on the final *HLA* model, *HLA-DQB1\*02:02*, *HLA-DPB1\*13:01* and *HLA-DRB1\*11:04* alleles. Both analyses corrected for the top 10 Principal Components.



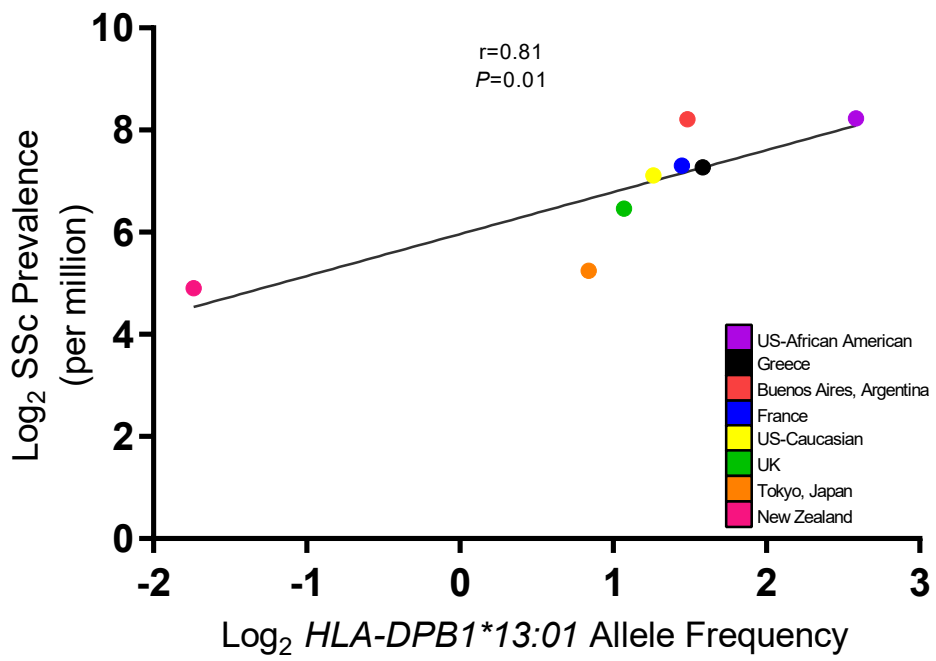

Fig. S5. Population frequency of *HLA-DPB1\*13:01* allele and SSc prevalence with outlier removed (see Figure 1).

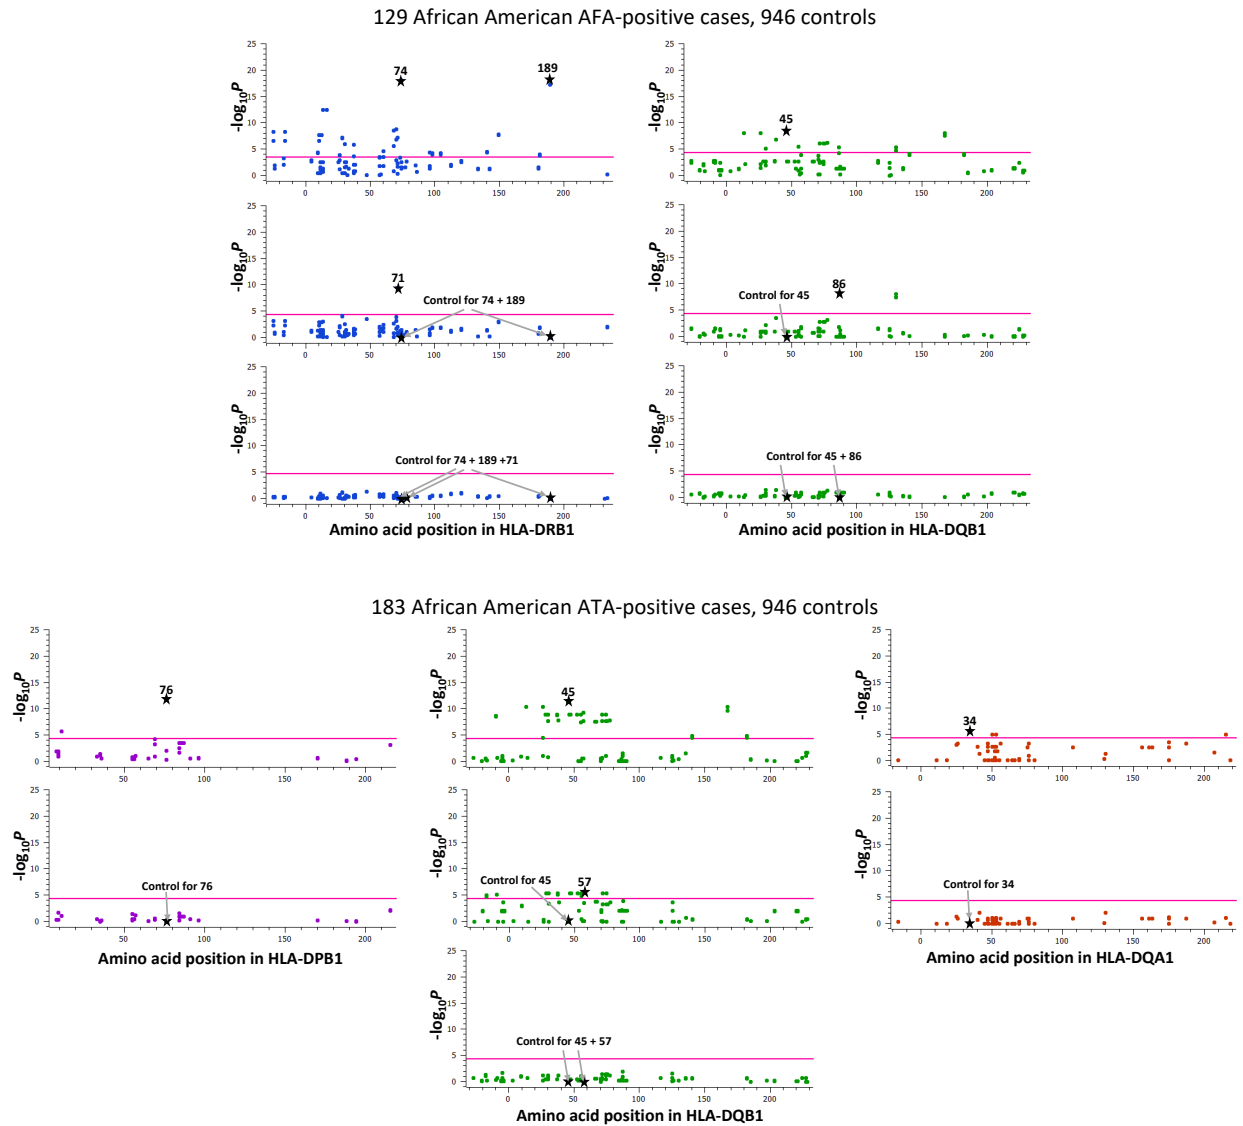

**Fig. S6. (A)** Logistic regression and conditional analysis of HLA polymorphic amino acids within autoantibody subsets of SSc in African Americans in the AFA+ SSc subset (top) and ATA+ SSc subset (bottom). (*SSc*=systemic sclerosis; *AFA*=anti-fibrillarin antibody; *ATA*=anti-topoisomerase I antibody)

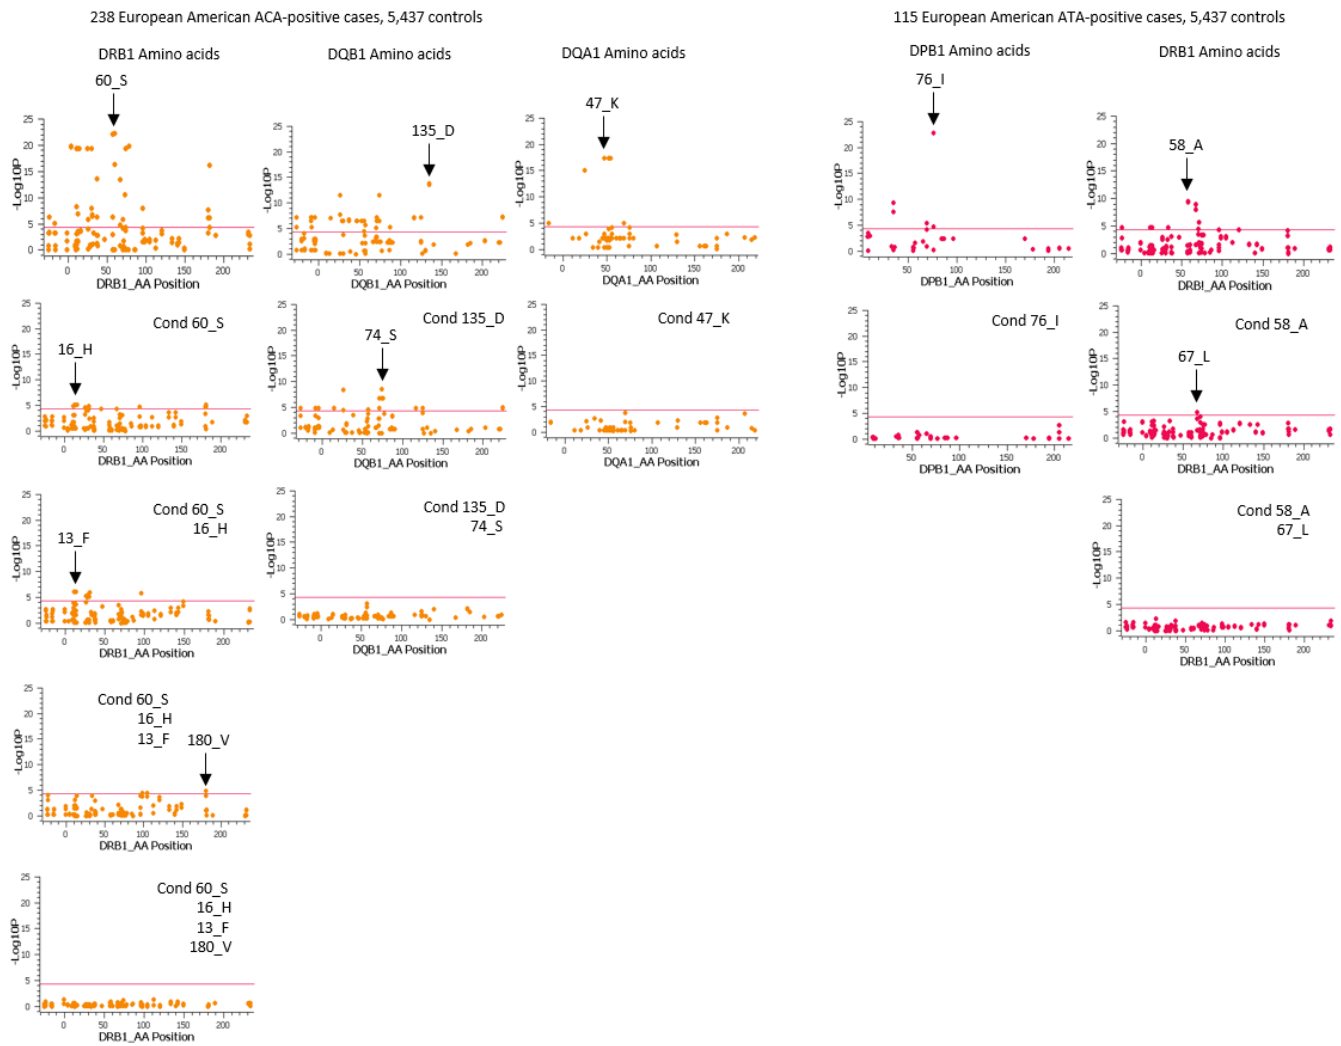

**Fig. S6. (B)** Logistic regression and conditional analysis of HLA polymorphic amino acids within autoantibody subsets of SSc in European Americans in the ACA+ SSc subset (left) and ATA+ SSc subset (right). (*SSc*=systemic sclerosis; *ACA*=anti-centromere antibody; *ATA*=anti-topoisomerase I antibody)

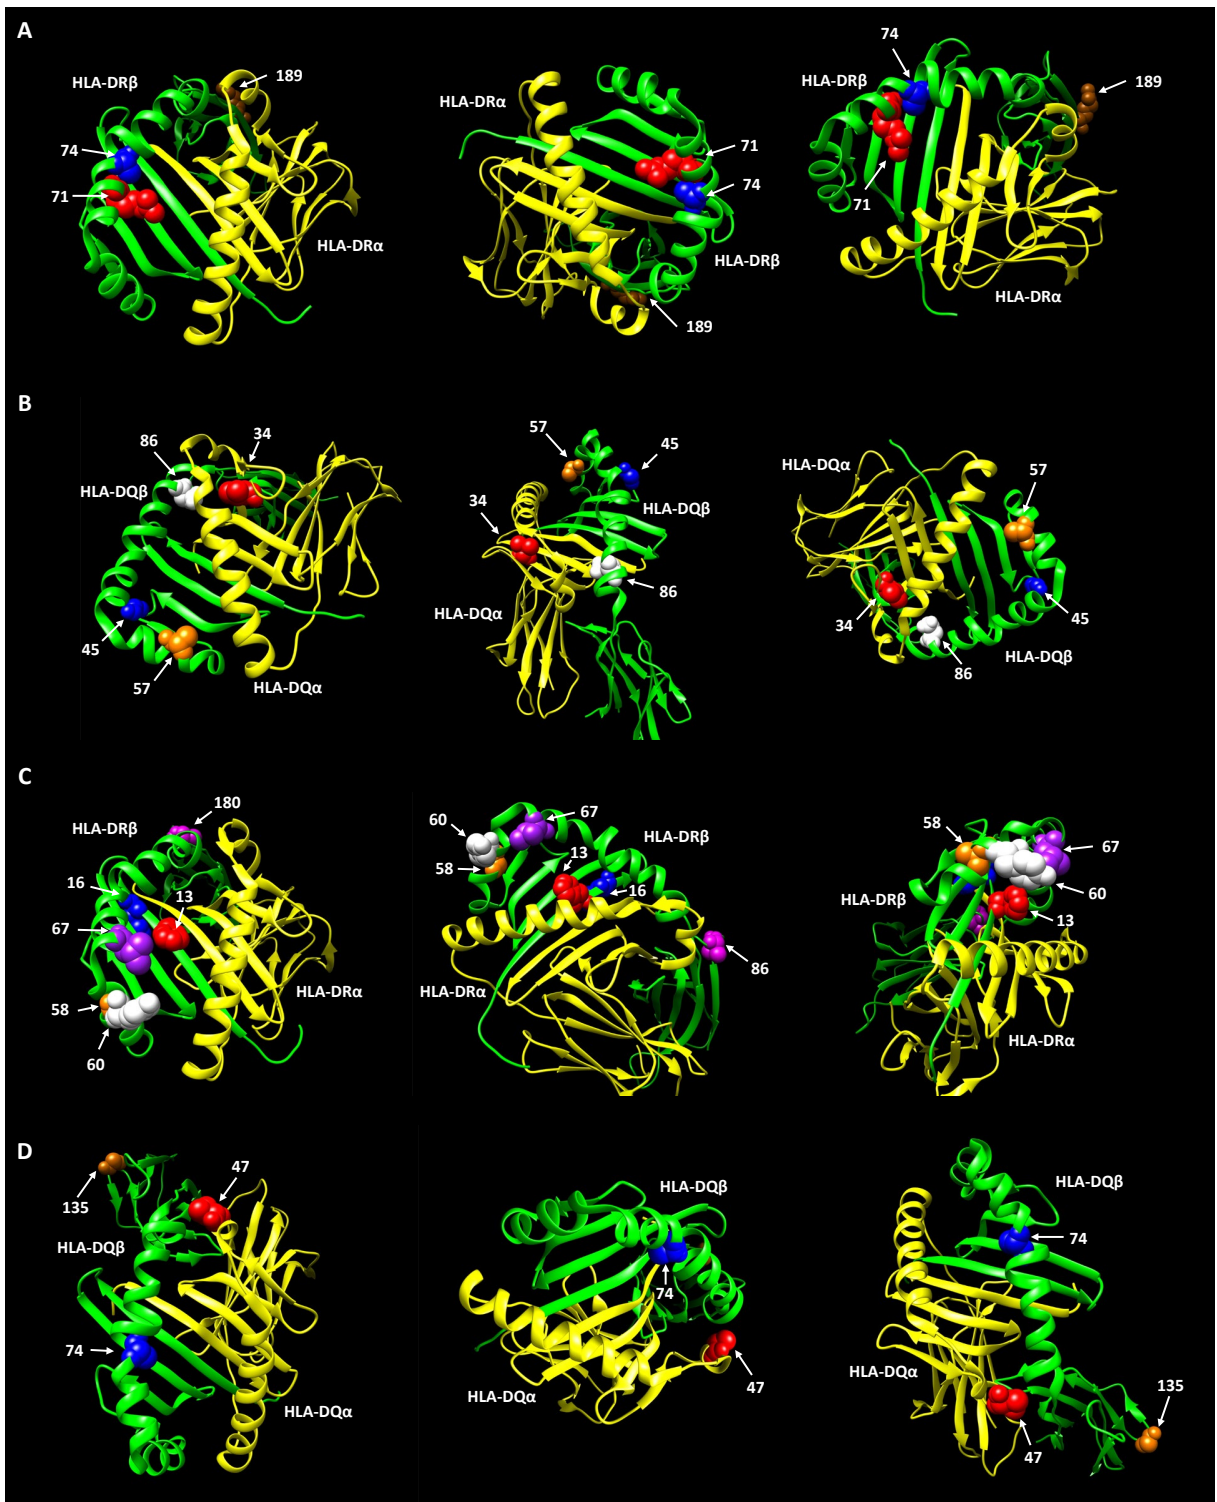

**Fig. S7.** Ribbon models of the HLA-DR and HLA-DQ proteins with independently associated amino acid residues, based on Protein Data Bank entries 6atf and 1s9v, respectively. (A) 3D model of HLA-DR in three different orientations in order to visualize peptide binding groove and associated amino acid positions in African Americans; (B) 3D model of HLA-DQ in three different orientations in order to visualize peptide binding groove and associated amino acid positions in African Americans; (C) 3D model of HLA-DR in three different orientations in order to visualize peptide binding groove and associated amino acid positions in European Americans; (D) 3D model of HLA-DQ in three different orientations in order to visualize peptide binding groove and associated amino acid positions in European Americans.

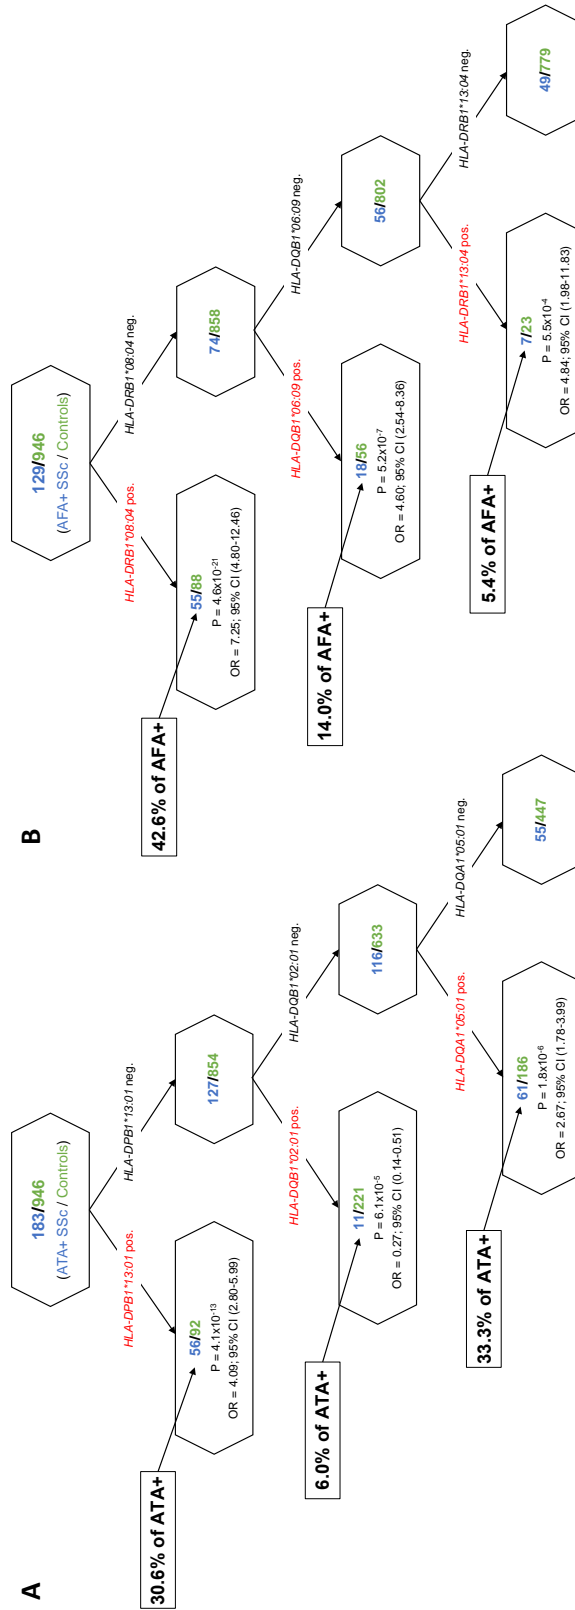

Fig. S8. Classification and regression tree (CART) analysis of (A) African American SSc anti-topoisomerase I autoantibody subset and (B) African American SSc anti-fibrillarin autoantibody subset.

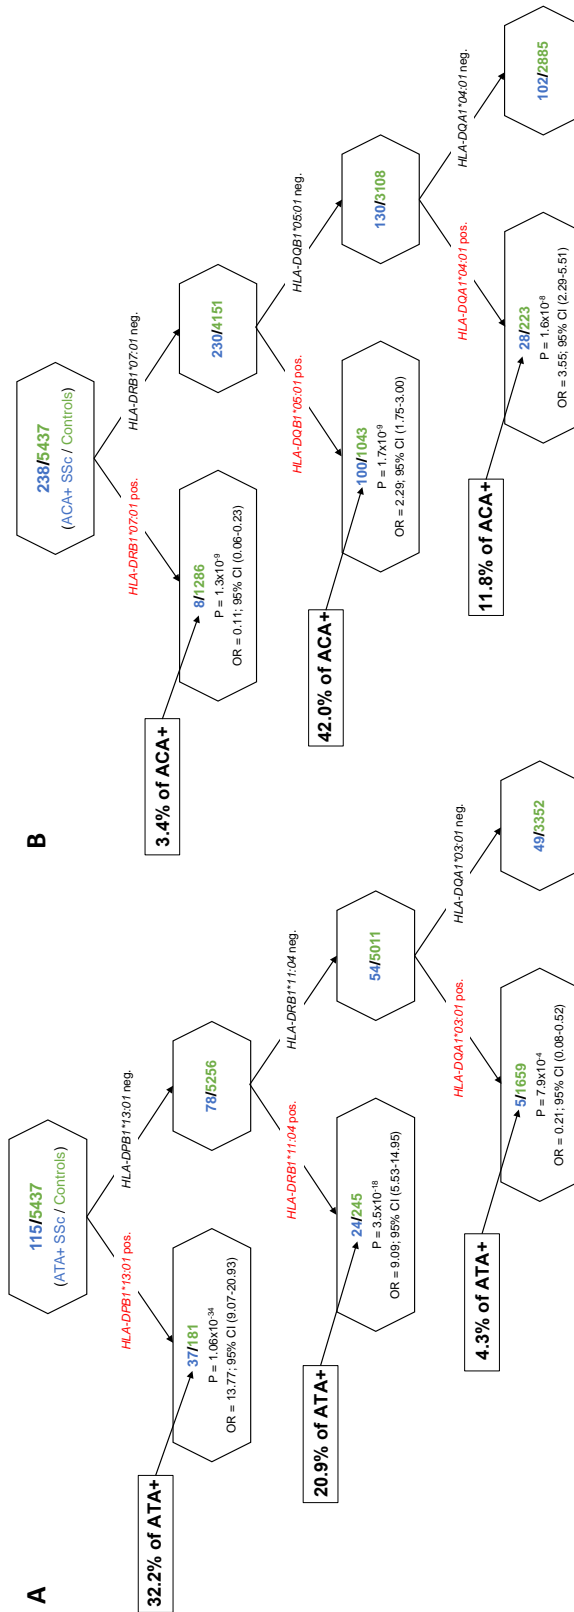

Fig. S9. Classification and regression tree (CART) analysis of (A) European American SSc anti-topoisomerase I autoantibody subset and (B) European American SSc anti-centromere autoantibody subset.

**Table S1. European American SSc and control datasets obtained from dbGaP.**

| <b>Sample Collection</b>                                                                                       | <b>dbGaP Accession Number</b> | <b># Samples Included</b> |
|----------------------------------------------------------------------------------------------------------------|-------------------------------|---------------------------|
| Genome-Wide Association Study in Systemic Sclerosis, cases                                                     | phs000357.v1.p1               | 723                       |
| Cohort-Based Genome-Wide Association Study of Glioma (GliomaScan), controls                                    | phs000652.v1.p1               | 29                        |
| GWAS for Genetic Determinants of Bone Fragility, controls                                                      | phs000138.v2.p1               | 714                       |
| Cancer Genetic Markers of Susceptibility for Bladder Cancer (CGEMS Bladder), controls                          | phs000346.v2.p2               | 1,354                     |
| The Breast and Prostate Cancer Cohort Consortium (BPC3), controls                                              | phs000812.v1.p1               | 2,411                     |
| PGRN-RIKEN: Genome-Wide Association Study of Drug-Induced Long-QT Syndrome, controls                           | phs000331.v1.p1               | 169                       |
| NIA-Late Onset Alzheimer's Disease and National Cell Repository for Alzheimer's Disease Family Study, controls | phs000168.v2.p2               | 760                       |

**Table S2. Sample demographics.**

|                                     | <b>African Americans</b> | <b>European Americans</b> |
|-------------------------------------|--------------------------|---------------------------|
| <b>Controls</b>                     |                          |                           |
| n                                   | 946                      | 5,437                     |
| Female, number (%)                  | 502 (53.1)               | 3333 (61.3)               |
| Male, number (%)                    | 444 (46.9)               | 2103 (38.7)               |
| <b>SSc patients</b>                 |                          |                           |
| n                                   | 662*                     | 723                       |
| Female, number (%)                  | 510 (77)                 | 643 (88.9)                |
| Male, number (%)                    | 150 (22.7)               | 80 (11.1)                 |
| <b>Antibodies</b>                   |                          |                           |
| Anti-topoisomerase I, number (%)    | 183 (27.6)               | 115 (15.9)                |
| Anti-fibrillarin, number (%)        | 129 (19.5)               | Not Measured              |
| Anti-centromere, number (%)         | 64 (9.7)                 | 238 (32.9)                |
| Anti-RNA polymerase III, number (%) | 119 (18.0)               | 123 (17.0)                |

*\*Two samples had missing gender data.*



**Table S3. HLA\*IMP:03-imputed allele concordance with sequence-based types of 763 African Americans determined with HLA-PRG-LA.**

| <i>HLA Locus</i> | <i># Types with Frequency &gt; 1%*</i> | <i>Concordance Rate</i> |
|------------------|----------------------------------------|-------------------------|
| <i>HLA-A</i>     | 19                                     | 98.58%                  |
| <i>HLA-B</i>     | 24                                     | 98.62%                  |
| <i>HLA-C</i>     | 15                                     | 97.52%                  |
| <i>HLA-DRB1</i>  | 21                                     | 99.07%                  |
| <i>HLA-DQA1</i>  | 7                                      | 98.13%                  |
| <i>HLA-DQB1</i>  | 12                                     | 97.93%                  |
| <i>HLA-DPA1</i>  | 3                                      | 95.96%                  |
| <i>HLA-DPB1</i>  | 11                                     | 99.03%                  |

*\*In the HLA-PRG-LA data.*

**Table S4. HLA allele frequencies in African Americans.**

| Allele             | Frequency Cases (%) | Frequency Controls (%) |
|--------------------|---------------------|------------------------|
|                    | n=662               | n=946                  |
| <i>HLA-A*01:01</i> | 4.0                 | 4.5                    |
| <i>HLA-A*02:01</i> | 13.0                | 12.0                   |
| <i>HLA-A*02:02</i> | 3.4                 | 3.4                    |
| <i>HLA-A*02:05</i> | 2.2                 | 2.3                    |
| <i>HLA-A*03:01</i> | 8.5                 | 7.4                    |
| <i>HLA-A*11:01</i> | 1.1                 | 1.3                    |
| <i>HLA-A*23:01</i> | 12.1                | 10.4                   |
| <i>HLA-A*24:02</i> | 1.6                 | 2.6                    |
| <i>HLA-A*26:01</i> | 1.4                 | 1.4                    |
| <i>HLA-A*29:02</i> | 2.8                 | 3.7                    |
| <i>HLA-A*30:01</i> | 6.8                 | 6.6                    |
| <i>HLA-A*30:02</i> | 5.5                 | 6.1                    |
| <i>HLA-A*32:01</i> | 1.0                 | 1.5                    |
| <i>HLA-A*33:01</i> | 3.0                 | 2.6                    |
| <i>HLA-A*33:03</i> | 5.9                 | 5.5                    |
| <i>HLA-A*34:02</i> | 3.2                 | 3.5                    |
| <i>HLA-A*36:01</i> | 2.6                 | 2.4                    |
| <i>HLA-A*66:01</i> | 1.4                 | 1.7                    |
| <i>HLA-A*68:01</i> | 4.3                 | 4.6                    |
| <i>HLA-A*74:01</i> | 4.4                 | 5.3                    |
| <i>HLA-B*07:02</i> | 6.5                 | 7.9                    |
| <i>HLA-B*08:01</i> | 4.9                 | 4.2                    |
| <i>HLA-B*14:02</i> | 2.0                 | 2.1                    |
| <i>HLA-B*15:01</i> | 0.8                 | 1.6                    |
| <i>HLA-B*15:03</i> | 5.7                 | 5.3                    |
| <i>HLA-B*15:10</i> | 3.0                 | 3.4                    |
| <i>HLA-B*15:16</i> | 2.0                 | 1.3                    |
| <i>HLA-B*18:01</i> | 2.9                 | 3.4                    |
| <i>HLA-B*35:01</i> | 7.2                 | 7.5                    |
| <i>HLA-B*40:01</i> | 1.1                 | 1.0                    |
| <i>HLA-B*42:01</i> | 5.3                 | 5.8                    |
| <i>HLA-B*44:02</i> | 1.4                 | 1.3                    |
| <i>HLA-B*44:03</i> | 5.0                 | 5.5                    |
| <i>HLA-B*45:01</i> | 4.6                 | 4.7                    |
| <i>HLA-B*49:01</i> | 3.0                 | 3.0                    |
| <i>HLA-B*51:01</i> | 3.9                 | 2.6                    |
| <i>HLA-B*53:01</i> | 15.0                | 11.7                   |
| <i>HLA-B*57:01</i> | 1.1                 | 1.2                    |
| <i>HLA-B*57:03</i> | 2.1                 | 3.5                    |
| <i>HLA-B*58:01</i> | 4.7                 | 4.3                    |
| <i>HLA-B*58:02</i> | 4.3                 | 4.2                    |
| <i>HLA-B*81:01</i> | 1.1                 | 1.7                    |

(continued on next page)

**Table S4. HLA allele frequencies in African Americans (continued).**

| Allele                | Frequency Cases (%) | Frequency Controls (%) |
|-----------------------|---------------------|------------------------|
|                       | n=662               | n=946                  |
| <i>HLA-C*02:02</i>    | 6.0                 | 6.2                    |
| <i>HLA-C*02:10</i>    | 1.7                 | 1.2                    |
| <i>HLA-C*03:02</i>    | 2.2                 | 1.8                    |
| <i>HLA-C*03:03</i>    | 0.9                 | 1.4                    |
| <i>HLA-C*03:04</i>    | 5.6                 | 4.9                    |
| <i>HLA-C*04:01</i>    | 23.0                | 20.3                   |
| <i>HLA-C*05:01</i>    | 2.7                 | 2.6                    |
| <i>HLA-C*06:02</i>    | 8.8                 | 9.4                    |
| <i>HLA-C*07:01</i>    | 11.9                | 13.1                   |
| <i>HLA-C*07:02</i>    | 6.8                 | 8.1                    |
| <i>HLA-C*08:02</i>    | 3.1                 | 3.8                    |
| <i>HLA-C*12:03</i>    | 1.0                 | 1.8                    |
| <i>HLA-C*14:02</i>    | 2.3                 | 1.8                    |
| <i>HLA-C*15:05</i>    | 0.8                 | 1.0                    |
| <i>HLA-C*16:01</i>    | 10.5                | 8.6                    |
| <i>HLA-C*17:01</i>    | 6.9                 | 7.1                    |
| <i>HLA-C*18:01</i>    | 2.3                 | 3.2                    |
| <i>HLA-DRB1*01:01</i> | 2.1                 | 2.1                    |
| <i>HLA-DRB1*01:02</i> | 2.5                 | 3.9                    |
| <i>HLA-DRB1*03:01</i> | 4.8                 | 7.7                    |
| <i>HLA-DRB1*04:01</i> | 1.1                 | 1.7                    |
| <i>HLA-DRB1*04:05</i> | 0.8                 | 2.0                    |
| <i>HLA-DRB1*07:01</i> | 5.8                 | 10.7                   |
| <i>HLA-DRB1*08:04</i> | 12.7                | 4.8                    |
| <i>HLA-DRB1*09:01</i> | 2.5                 | 2.5                    |
| <i>HLA-DRB1*10:01</i> | 1.1                 | 1.6                    |
| <i>HLA-DRB1*11:01</i> | 9.4                 | 7.9                    |
| <i>HLA-DRB1*11:02</i> | 7.3                 | 3.8                    |
| <i>HLA-DRB1*12:01</i> | 2.5                 | 3.8                    |
| <i>HLA-DRB1*13:01</i> | 3.8                 | 4.4                    |
| <i>HLA-DRB1*13:02</i> | 8.8                 | 7.1                    |
| <i>HLA-DRB1*13:03</i> | 2.9                 | 3.5                    |
| <i>HLA-DRB1*13:04</i> | 3.1                 | 1.3                    |
| <i>HLA-DRB1*14:01</i> | 1.1                 | 2.3                    |
| <i>HLA-DRB1*15:01</i> | 3.0                 | 3.2                    |
| <i>HLA-DRB1*15:03</i> | 13.1                | 12.6                   |
| <i>HLA-DRB1*16:02</i> | 1.4                 | 1.4                    |
| <i>HLA-DQA1*01:01</i> | 9.9                 | 13.3                   |
| <i>HLA-DQA1*01:02</i> | 33.9                | 31.1                   |
| <i>HLA-DQA1*01:03</i> | 1.9                 | 2.4                    |
| <i>HLA-DQA1*02:01</i> | 5.9                 | 10.7                   |
| <i>HLA-DQA1*03:01</i> | 7.9                 | 10.5                   |
| <i>HLA-DQA1*04:01</i> | 12.2                | 10.1                   |
| <i>HLA-DQA1*05:01</i> | 28.0                | 21.5                   |
| <i>HLA-DQB1*02:01</i> | 9.1                 | 13.5                   |
| <i>HLA-DQB1*02:02</i> | 4.2                 | 7.5                    |
| <i>HLA-DQB1*03:01</i> | 20.5                | 13.6                   |
| <i>HLA-DQB1*03:02</i> | 2.3                 | 3.3                    |
| <i>HLA-DQB1*03:03</i> | 2.0                 | 2.5                    |
| <i>HLA-DQB1*03:19</i> | 10.1                | 4.5                    |
| <i>HLA-DQB1*04:02</i> | 6.3                 | 7.7                    |
| <i>HLA-DQB1*05:01</i> | 12.4                | 14.5                   |
| <i>HLA-DQB1*05:03</i> | 0.9                 | 1.9                    |
| <i>HLA-DQB1*06:02</i> | 20.5                | 20.2                   |
| <i>HLA-DQB1*06:03</i> | 1.2                 | 1.4                    |
| <i>HLA-DQB1*06:04</i> | 2.1                 | 2.0                    |
| <i>HLA-DQB1*06:09</i> | 4.4                 | 3.3                    |

(continued on next page)

**Table S4. HLA allele frequencies in African Americans (continued).**

| Allele                | Frequency Cases (%) | Frequency Controls (%) |
|-----------------------|---------------------|------------------------|
|                       | n=662               | n=946                  |
| <i>HLA-DPA1*01:03</i> | 32.6                | 39.1                   |
| <i>HLA-DPA1*02:01</i> | 40.0                | 31.0                   |
| <i>HLA-DPA1*02:02</i> | 15.3                | 16.3                   |
| <i>HLA-DPA1*03:01</i> | 11.6                | 12.4                   |
| <i>HLA-DPB1*01:01</i> | 32.2                | 28.5                   |
| <i>HLA-DPB1*02:01</i> | 12.7                | 13.2                   |
| <i>HLA-DPB1*03:01</i> | 5.3                 | 5.3                    |
| <i>HLA-DPB1*04:01</i> | 8.4                 | 10.9                   |
| <i>HLA-DPB1*04:02</i> | 11.3                | 12.7                   |
| <i>HLA-DPB1*11:01</i> | 1.7                 | 3.1                    |
| <i>HLA-DPB1*13:01</i> | 9.0                 | 5.1                    |
| <i>HLA-DPB1*17:01</i> | 8.9                 | 8.1                    |
| <i>HLA-DPB1*18:01</i> | 4.2                 | 7.0                    |
| <i>HLA-DPB1*40:01</i> | 1.9                 | 1.2                    |
| <i>HLA-DPB1*85:01</i> | 1.1                 | 1.5                    |

**Table S5. HLA allele frequencies in European Americans.**

| Allele             | Frequency Cases (%)<br>n=723 | Frequency Controls (%)<br>n=5437 |
|--------------------|------------------------------|----------------------------------|
| <i>HLA-A*01:01</i> | 16.9                         | 16.6                             |
| <i>HLA-A*02:01</i> | 28.7                         | 28.5                             |
| <i>HLA-A*03:01</i> | 14.3                         | 14.9                             |
| <i>HLA-A*11:01</i> | 6.3                          | 5.9                              |
| <i>HLA-A*23:01</i> | 1.7                          | 1.9                              |
| <i>HLA-A*24:02</i> | 9.5                          | 8.1                              |
| <i>HLA-A*25:01</i> | 2.0                          | 2.3                              |
| <i>HLA-A*26:01</i> | 3.3                          | 2.7                              |
| <i>HLA-A*29:02</i> | 2.1                          | 3.5                              |
| <i>HLA-A*30:01</i> | 0.9                          | 1.1                              |
| <i>HLA-A*31:01</i> | 2.6                          | 2.6                              |
| <i>HLA-A*32:01</i> | 3.2                          | 3.7                              |
| <i>HLA-A*68:01</i> | 2.8                          | 3.3                              |
| <i>HLA-B*07:02</i> | 12.3                         | 14.5                             |
| <i>HLA-B*08:01</i> | 14.5                         | 12.2                             |
| <i>HLA-B*13:02</i> | 1.2                          | 2.1                              |
| <i>HLA-B*14:02</i> | 2.9                          | 2.4                              |
| <i>HLA-B*15:01</i> | 6.2                          | 6.9                              |
| <i>HLA-B*18:01</i> | 5.5                          | 4.0                              |
| <i>HLA-B*27:05</i> | 4.1                          | 4.1                              |
| <i>HLA-B*35:01</i> | 7.8                          | 5.7                              |
| <i>HLA-B*35:02</i> | 1.4                          | 0.5                              |
| <i>HLA-B*35:03</i> | 1.2                          | 1.5                              |
| <i>HLA-B*37:01</i> | 1.2                          | 1.5                              |
| <i>HLA-B*38:01</i> | 1.4                          | 1.6                              |
| <i>HLA-B*39:01</i> | 1.7                          | 1.3                              |
| <i>HLA-B*40:01</i> | 5.5                          | 5.7                              |
| <i>HLA-B*40:02</i> | 1.5                          | 1.1                              |
| <i>HLA-B*44:02</i> | 9.5                          | 9.7                              |
| <i>HLA-B*44:03</i> | 2.6                          | 4.9                              |
| <i>HLA-B*49:01</i> | 0.9                          | 1.4                              |
| <i>HLA-B*51:01</i> | 5.4                          | 4.7                              |
| <i>HLA-B*55:01</i> | 1.7                          | 1.8                              |
| <i>HLA-B*57:01</i> | 2.6                          | 3.4                              |
| <i>HLA-C*01:02</i> | 3.6                          | 3.6                              |
| <i>HLA-C*02:02</i> | 4.7                          | 4.4                              |
| <i>HLA-C*03:03</i> | 5.2                          | 5.8                              |
| <i>HLA-C*03:04</i> | 8.0                          | 8.2                              |
| <i>HLA-C*04:01</i> | 12.1                         | 10.2                             |
| <i>HLA-C*05:01</i> | 9.0                          | 9.6                              |
| <i>HLA-C*06:02</i> | 6.4                          | 8.7                              |
| <i>HLA-C*07:01</i> | 18.7                         | 16.2                             |
| <i>HLA-C*07:02</i> | 13.7                         | 15.5                             |
| <i>HLA-C*07:04</i> | 1.9                          | 1.5                              |
| <i>HLA-C*08:02</i> | 3.4                          | 3.5                              |
| <i>HLA-C*12:03</i> | 4.9                          | 4.3                              |
| <i>HLA-C*14:02</i> | 1.5                          | 1.3                              |
| <i>HLA-C*15:05</i> | 2.1                          | 2.0                              |
| <i>HLA-C*16:01</i> | 1.9                          | 3.5                              |

(continued on next page)

**Table S5. HLA allele frequencies in European Americans (continued).**

| Allele                | Frequency Cases (%) | Frequency Controls (%) |
|-----------------------|---------------------|------------------------|
|                       | n=723               | n=5437                 |
| <i>HLA-DRB1*01:01</i> | 12.7                | 9.1                    |
| <i>HLA-DRB1*01:02</i> | 1.1                 | 0.9                    |
| <i>HLA-DRB1*01:03</i> | 0.8                 | 1.4                    |
| <i>HLA-DRB1*03:01</i> | 14.0                | 12.1                   |
| <i>HLA-DRB1*04:01</i> | 9.1                 | 10.0                   |
| <i>HLA-DRB1*04:04</i> | 5.1                 | 4.1                    |
| <i>HLA-DRB1*07:01</i> | 8.0                 | 12.7                   |
| <i>HLA-DRB1*08:01</i> | 3.4                 | 2.3                    |
| <i>HLA-DRB1*09:01</i> | 0.6                 | 1.0                    |
| <i>HLA-DRB1*11:01</i> | 5.5                 | 5.2                    |
| <i>HLA-DRB1*11:04</i> | 5.3                 | 2.4                    |
| <i>HLA-DRB1*12:01</i> | 0.8                 | 1.5                    |
| <i>HLA-DRB1*13:01</i> | 4.6                 | 6.3                    |
| <i>HLA-DRB1*13:02</i> | 4.4                 | 4.3                    |
| <i>HLA-DRB1*14:01</i> | 1.1                 | 2.5                    |
| <i>HLA-DRB1*15:01</i> | 12.2                | 14.6                   |
| <i>HLA-DRB1*16:01</i> | 1.7                 | 1.4                    |
| <i>HLA-DQA1*01:01</i> | 17.4                | 14.5                   |
| <i>HLA-DQA1*01:02</i> | 19.3                | 21.3                   |
| <i>HLA-DQA1*01:03</i> | 4.9                 | 6.6                    |
| <i>HLA-DQA1*02:01</i> | 8.4                 | 13.1                   |
| <i>HLA-DQA1*03:01</i> | 17.8                | 17.8                   |
| <i>HLA-DQA1*04:01</i> | 4.2                 | 2.7                    |
| <i>HLA-DQA1*05:01</i> | 27.7                | 23.6                   |
| <i>HLA-DQB1*02:01</i> | 14.2                | 12.6                   |
| <i>HLA-DQB1*02:02</i> | 5.3                 | 9.5                    |
| <i>HLA-DQB1*03:01</i> | 20.5                | 18.0                   |
| <i>HLA-DQB1*03:02</i> | 10.6                | 10.2                   |
| <i>HLA-DQB1*03:03</i> | 3.7                 | 4.6                    |
| <i>HLA-DQB1*04:02</i> | 3.9                 | 2.7                    |
| <i>HLA-DQB1*05:01</i> | 14.9                | 11.9                   |
| <i>HLA-DQB1*05:02</i> | 2.6                 | 1.5                    |
| <i>HLA-DQB1*05:03</i> | 2.1                 | 2.7                    |
| <i>HLA-DQB1*06:02</i> | 12.4                | 14.8                   |
| <i>HLA-DQB1*06:03</i> | 4.5                 | 6.4                    |
| <i>HLA-DQB1*06:04</i> | 3.7                 | 3.6                    |
| <i>HLA-DPA1*01:03</i> | 80.4                | 82.1                   |
| <i>HLA-DPA1*02:01</i> | 16.7                | 14.1                   |
| <i>HLA-DPA1*02:02</i> | 2.6                 | 3.1                    |
| <i>HLA-DPB1*01:01</i> | 6.4                 | 5.4                    |
| <i>HLA-DPB1*02:01</i> | 10.6                | 12.0                   |
| <i>HLA-DPB1*03:01</i> | 12.4                | 11.1                   |
| <i>HLA-DPB1*04:01</i> | 41.3                | 43.8                   |
| <i>HLA-DPB1*04:02</i> | 12.2                | 12.3                   |
| <i>HLA-DPB1*05:01</i> | 2.0                 | 1.9                    |
| <i>HLA-DPB1*06:01</i> | 2.1                 | 2.1                    |
| <i>HLA-DPB1*10:01</i> | 2.3                 | 1.7                    |
| <i>HLA-DPB1*11:01</i> | 1.1                 | 2.2                    |
| <i>HLA-DPB1*13:01</i> | 4.2                 | 1.7                    |
| <i>HLA-DPB1*14:01</i> | 1.3                 | 1.5                    |
| <i>HLA-DPB1*17:01</i> | 1.0                 | 1.2                    |

**Table S6. Scleroderma Prevalence and *HLA-DPB1\*13:01* Allele Frequency in Different Populations Around the World.**

| <b>Population</b>       | <b>SSc Prevalence<br/>(per million)</b> | <b>SSc Prevalence<br/>Reference</b> | <b><i>HLA-DPB1*13:01</i><br/>Allele Frequency (%)</b> | <b><i>HLA-DPB1*13:01</i><br/>Allele Frequency Reference</b>                                                                       |
|-------------------------|-----------------------------------------|-------------------------------------|-------------------------------------------------------|-----------------------------------------------------------------------------------------------------------------------------------|
| Buenos Aires, Argentina | 296                                     | (32)                                | 2.8                                                   | <a href="http://www.allelefrequencies.net/pop6001c.asp?pop_id=1310">http://www.allelefrequencies.net/pop6001c.asp?pop_id=1310</a> |
| Tokyo, Japan            | 38                                      | (33)                                | 1.79                                                  | <a href="http://www.allelefrequencies.net/pop6001c.asp?pop_id=3279">http://www.allelefrequencies.net/pop6001c.asp?pop_id=3279</a> |
| US-Caucasian            | 138                                     | (34)                                | 2.4                                                   | <a href="http://www.allelefrequencies.net/pop6001c.asp?pop_id=2780">http://www.allelefrequencies.net/pop6001c.asp?pop_id=2780</a> |
| UK                      | 88                                      | (35)                                | 2.1                                                   | <a href="http://www.allelefrequencies.net/pop6001c.asp?pop_id=2511">http://www.allelefrequencies.net/pop6001c.asp?pop_id=2511</a> |
| France                  | 158                                     | (36)                                | 2.73                                                  | <a href="http://www.allelefrequencies.net/pop6001c.asp?pop_id=2517">http://www.allelefrequencies.net/pop6001c.asp?pop_id=2517</a> |
| US-African American     | 300                                     | (37)                                | 6                                                     | <a href="http://www.allelefrequencies.net/pop6001c.asp?pop_id=2779">http://www.allelefrequencies.net/pop6001c.asp?pop_id=2779</a> |
| New Zealand             | 30                                      | (38)                                | 0.3                                                   | <a href="http://www.allelefrequencies.net/pop6001c.asp?pop_id=2160">http://www.allelefrequencies.net/pop6001c.asp?pop_id=2160</a> |
| Greece                  | 154                                     | (39)                                | 3                                                     | <a href="http://www.allelefrequencies.net/pop6001c.asp?pop_id=1759">http://www.allelefrequencies.net/pop6001c.asp?pop_id=1759</a> |
| Choctaw                 | 4690                                    | (40)                                | 22                                                    | (41)                                                                                                                              |

Table S7. HLA allele associations in autoantibody positive and negative subsets in African Americans.

|                                             |                      | Freq %<br>(SSc/Ctrls) | OR (95% CI)<br>UnConditioned | P-value                      |
|---------------------------------------------|----------------------|-----------------------|------------------------------|------------------------------|
| All SSc v controls<br>SSc=662; Control=946  | <b>HLA-DRB1*0804</b> | <b>24.3 / 9.3</b>     | <b>3.2 (2.4-4.3)</b>         | <b>3.26×10<sup>-16</sup></b> |
|                                             | HLA-DQB1*0319        | 18.4 / 8.8            | 2.4 (1.8-3.2)                | 2.45×10 <sup>-8</sup>        |
|                                             | HLA-DQB1*0301        | 37 / 25.8             | 1.8 (1.4-2.2)                | 1.41×10 <sup>-6</sup>        |
|                                             | HLA-DRB1*0701        | 11.5 / 20             | 0.6 (0.4-0.7)                | 2.72×10 <sup>-6</sup>        |
|                                             | HLA-DQA1*0201        | 11.5 / 20             | 0.6 (0.4-0.7)                | 3.18×10 <sup>-6</sup>        |
|                                             | <b>HLA-DRB1*1102</b> | <b>13.6 / 7.1</b>     | <b>2.2 (1.6-3)</b>           | <b>9.39×10<sup>-6</sup></b>  |
|                                             | HLA-DPA1*0201        | 62.1 / 51.5           | 1.6 (1.3-1.9)                | 3.20×10 <sup>-5</sup>        |
|                                             | HLA-DPB1*1301        | 16.9 / 9.7            | 1.9 (1.4-2.6)                | 3.21×10 <sup>-5</sup>        |
| AFA+ SSc v controls<br>SSc=129; Control=946 | <b>HLA-DRB1*0804</b> | <b>42.6 / 9.3</b>     | <b>7.4 (4.9-11.3)</b>        | <b>2.61×10<sup>-19</sup></b> |
|                                             | <b>HLA-DQB1*0609</b> | <b>20.9 / 6.6</b>     | <b>3.8 (2.3-6.3)</b>         | <b>1.37×10<sup>-6</sup></b>  |
|                                             | HLA-DQB1*0301        | 45 / 25.8             | 2.5 (1.7-3.6)                | 9.16×10 <sup>-6</sup>        |
|                                             | HLA-DQB1*0319        | 22.5 / 8.8            | 3 (1.9-4.9)                  | 2.53×10 <sup>-5</sup>        |
|                                             | HLA-DRB1*1302        | 29.5 / 13.8           | 2.6 (1.7-4)                  | 3.70×10 <sup>-5</sup>        |
| AFA- SSc v controls<br>SSc=533; Control=946 | HLA-DRB1*0804        | 19.9 / 9.3            | 2.5 (1.8-3.3)                | 1.05×10 <sup>-8</sup>        |
|                                             | HLA-DQB1*0609        | 5.6 / 6.6             | 0.9 (0.6-1.4)                | 0.62                         |
| ATA+ SSc v controls<br>SSc=183; Control=946 | <b>HLA-DPB1*1301</b> | <b>30.6 / 9.7</b>     | <b>4.3 (2.9-6.3)</b>         | <b>2.35×10<sup>-12</sup></b> |
|                                             | <b>HLA-DQB1*0201</b> | <b>7.7 / 25.1</b>     | <b>0.3 (0.2-0.5)</b>         | <b>1.10×10<sup>-8</sup></b>  |
|                                             | HLA-DRB1*0301        | 3.3 / 14.9            | 0.2 (0.1-0.5)                | 4.92×10 <sup>-7</sup>        |
|                                             | HLA-DQB1*0301        | 43.7 / 25.8           | 2.3 (1.7-3.1)                | 2.64×10 <sup>-6</sup>        |
|                                             | HLA-DPA1*0201        | 69.9 / 51.5           | 2.3 (1.6-3.2)                | 2.73×10 <sup>-6</sup>        |
|                                             | HLA-DRB1*0804        | 21.3 / 9.3            | 2.8 (1.8-4.2)                | 8.13×10 <sup>-6</sup>        |
|                                             | HLA-DQA1*0501        | 51.4 / 39.1           | 1.6 (1.2-2.2)                | 2.90×10 <sup>-3</sup>        |
| ATA- SSc v controls<br>SSc=479; Control=946 | HLA-DPB1*1301        | 11.7 / 9.7            | 1.2 (0.9-1.7)                | 0.27                         |
|                                             | HLA-DQB1*0201        | 22.1 / 25.1           | 0.8 (0.7-1.1)                | 0.21                         |

\* Frequency of individuals with one or two alleles.  
Common AA haplotype: HLA-DRB1\*08:04/DQA1\*05:01/DQB1\*03:01.



Table S8. HLA allele associations in autoantibody positive and negative subsets in European Americans.

|                                              |                      | Freq %<br>(SSc/Ctrls) | OR (95% CI)<br>UnConditioned | P-value                      |
|----------------------------------------------|----------------------|-----------------------|------------------------------|------------------------------|
| All SSc v controls<br>SSc=723; Control=5437  | <b>HLA-DQB1*0202</b> | <b>10.2 / 18</b>      | <b>0.5 (0.4-0.6)</b>         | <b>3.55×10<sup>-9</sup></b>  |
|                                              | HLA-DRB1*0701        | 15.1 / 23.7           | 0.5 (0.4-0.7)                | 6.06×10 <sup>-9</sup>        |
|                                              | HLA-DQA1*0201        | 15.8 / 24.3           | 0.6 (0.4-0.7)                | 1.04×10 <sup>-8</sup>        |
|                                              | <b>HLA-DPB1*1301</b> | <b>8.3 / 3.3</b>      | <b>2.6 (1.9-3.5)</b>         | <b>1.75×10<sup>-8</sup></b>  |
|                                              | <b>HLA-DRB1*1104</b> | <b>10.5 / 4.7</b>     | <b>2.2 (1.7-2.9)</b>         | <b>9.25×10<sup>-8</sup></b>  |
|                                              | HLA-B*4403           | 5.1 / 9.7             | 0.5 (0.3-0.7)                | 4.72×10 <sup>-6</sup>        |
|                                              | HLA-DRB1*0101        | 23.7 / 17.3           | 1.5 (1.2-1.8)                | 4.39×10 <sup>-5</sup>        |
| ATA+ SSc v controls<br>SSc=115; Control=5437 | <b>HLA-DPB1*1301</b> | <b>32.2 / 3.3</b>     | <b>13.7 (8.9-21)</b>         | <b>1.47×10<sup>-24</sup></b> |
|                                              | <b>HLA-DRB1*1104</b> | <b>25.2 / 4.7</b>     | <b>6.3 (3.9-10)</b>          | <b>8.62×10<sup>-12</sup></b> |
|                                              | HLA-DPA1*0201        | 48.7 / 26.3           | 2.9 (2-4.2)                  | 8.70×10 <sup>-8</sup>        |
|                                              | HLA-DPA1*0103        | 54.8 / 32.6           | 2.7 (1.8-3.9)                | 4.65×10 <sup>-7</sup>        |
| ATA- SSc v controls<br>SSc=608; Control=5437 | HLA-DPB1*1301        | 3.8 / 3.3             | 1.1 (0.7-1.7)                | 0.65                         |
|                                              | HLA-DRB1*1104        | 7.7 / 4.7             | 1.6 (1.1-2.2)                | 8.81×10 <sup>-3</sup>        |
| ACA+ SSc v controls<br>SSc=238; Control=5437 | <b>HLA-DRB1*0701</b> | <b>3.4 / 23.7</b>     | <b>0.1 (0.05-0.2)</b>        | <b>4.79×10<sup>-20</sup></b> |
|                                              | HLA-DQA1*0201        | 4.6 / 14.5            | 0.1 (0.1-0.2)                | 4.85×10 <sup>-18</sup>       |
|                                              | HLA-DQB1*0202        | 2.9 / 18              | 0.1 (0.1-0.3)                | 2.44×10 <sup>-14</sup>       |
|                                              | <b>HLA-DQB1*0501</b> | <b>42.4 / 22.3</b>    | <b>2.3 (1.8-3)</b>           | <b>4.21×10<sup>-9</sup></b>  |
|                                              | HLA-DQA1*0101        | 47.5 / 26.7           | 2.2 (1.7-2.9)                | 7.08×10 <sup>-9</sup>        |
|                                              | HLA-DRB1*0101        | 34.5 / 17.3           | 2.2 (1.7-3)                  | 1.32×10 <sup>-7</sup>        |
|                                              | <b>HLA-DQA1*0401</b> | <b>14.3 / 5.4</b>     | <b>2.7 (1.8-4)</b>           | <b>4.18×10<sup>-6</sup></b>  |
|                                              | HLA-DQB1*0303        | 2.1 / 8.9             | 0.2 (0.1-0.5)                | 6.29×10 <sup>-6</sup>        |
| ACA- SSc v controls<br>SSc=485; Control=5437 | HLA-DRB1*0701        | 20.8 / 23.7           | 0.8 (0.7-1.1)                | 0.13                         |
|                                              | HLA-DQB1*0501        | 19.4 / 22.3           | 0.9 (0.7-1.1)                | 0.28                         |
|                                              | HLA-DQA1*0401        | 5.2 / 5.4             | 1.0 (0.6-1.5)                | 0.95                         |

\* Frequency of individuals with one or two alleles.

Common EA haplotypes: HLA-DRB1\*11:04/DQA1\*05:01/DQB1\*03:01.

Common EA haplotypes: HLA-DRB1\*07:01/DQA1\*02:01/DQB1\*02:02.

Table S9. Predicted immunodominant peptides in topoisomerase I protein; peptide in red shown in the manuscript in Figure 5.

| ATA+ SSc Subset |            |                        |                              |                              |
|-----------------|------------|------------------------|------------------------------|------------------------------|
| Ancestry        | Peptide    | Affinity (nM)          |                              |                              |
|                 | Position   | Sequence               | <i>DPA1*02:01/DPB1*13:01</i> | <i>DRA1*01:01/DRB1*11:04</i> |
|                 | 420        | IQGSIKYIMLNPSR         | 498.1                        | 132.1                        |
|                 | 421        | QGSIKYIMLNPSRI         | 357.6                        | 81.7                         |
|                 | 422        | GSIKYIMLNPSRIK         | 374.8                        | 59.9                         |
|                 | 423        | SIKYIMLNPSRIKG         | 448.4                        | 58.4                         |
|                 | 468        | KEMKVRQRAVALYFI        | 492.6                        | 94.0                         |
|                 | 469        | EMKVRQRAVALYFID        | 488.2                        | 169.7                        |
|                 | 470        | MKVRQRAVALYFIDK        | 397.4                        | 290.8                        |
|                 | <b>473</b> | <b>RQRAVALYFIDKLAL</b> | <b>264.2</b>                 | <b>340.3</b>                 |
| EA              | 474        | QRAVALYFIDKLALR        | 320.0                        | 195.9                        |
|                 | 475        | RAVALYFIDKLALRA        | 340.4                        | 131.0                        |
|                 | 476        | AVALYFIDKLALRAG        | 481.1                        | 117.5                        |
|                 | 541        | VPVEKRVFKNLQLFM        | 400.4                        | 391.4                        |
|                 | 542        | PVEKRVFKNLQLFME        | 224.8                        | 361.4                        |
|                 | 543        | VEKRVFKNLQLFMEN        | 187.4                        | 328.0                        |
|                 | 544        | EKRVFKNLQLFMENK        | 187.4                        | 306.2                        |
|                 | 545        | KRVFKNLQLFMENKQ        | 246.2                        | 311.3                        |
|                 | 546        | RVFKNLQLFMENKQP        | 408.9                        | 456.4                        |
|                 | Position   | Sequence               | <i>DPA1*02:01/DPB1*13:01</i> | <i>DQA1*05:01/DQB1*02:01</i> |
| AA              | 472        | VRQRAVALYFIDKLA        | 268.2                        | 489.2                        |
|                 | <b>473</b> | <b>RQRAVALYFIDKLAL</b> | <b>264.2</b>                 | <b>446.4</b>                 |

Table S10. Predicted immunodominant peptides in fibrillar protein; peptide in red shown in the manuscript in Figure 5. (LD=linkage disequilibrium)

| Ancestry | Peptide  |                        | AFA+ SSc Subset              |                              |                              |
|----------|----------|------------------------|------------------------------|------------------------------|------------------------------|
|          | Position | Sequence               | <i>DRA1*01:01/DRB1*08:04</i> | <i>DQA1*01:02/DOB1*06:09</i> | <i>DRA1*01:01/DRB1*13:02</i> |
|          | 130      | DKIEYRAWNPFRSKL        | 491.0                        | 15195.4                      | 455.9                        |
|          | 131      | KIEYRAWNPFRSKLA        | 296.5                        | 13720.9                      | 377.2                        |
|          | 132      | IEYRAWNPFRSKLAA        | 276.3                        | 14399.6                      | 539.5                        |
|          | 133      | EYRAWNPFRSKLAAA        | 270.5                        | 14939.3                      | 810.2                        |
|          | 134      | YRAWNPFRSKLAAAI        | 230.8                        | 11841.2                      | 359.9                        |
|          | 135      | RAWNPFRSKLAAAIL        | 235.1                        | 10171.3                      | 226.2                        |
|          | 136      | AWNPFRSKLAAAILG        | 273.8                        | 9922.7                       | 270.4                        |
|          | 137      | WNPFRSKLAAAILGG        | 315.4                        | 9407.5                       | 332.6                        |
|          | 138      | NPFRSKLAAAILGGV        | 381.7                        | 7104.8                       | 390.8                        |
|          | 151      | GVDQIHKPGAKVLY         | 323.8                        | 19226.5                      | 90.4                         |
|          | 152      | VDQIHKPGAKVLYL         | 249.2                        | 17250.9                      | 69.1                         |
|          | 153      | DQIHKPGAKVLYLG         | 270.0                        | 18134.6                      | 86.8                         |
|          | 154      | QIHKPGAKVLYLGA         | 245.7                        | 16850.1                      | 106.1                        |
|          | 155      | IHKPGAKVLYLGAA         | 404.1                        | 15835.1                      | 285.2                        |
|          | 184      | DGLVYAVEFSHRSGR        | 465.1                        | 14957.9                      | 1244.2                       |
|          | 185      | GLVYAVEFSHRSGRD        | 435.2                        | 18178.8                      | 1278.0                       |
|          | 186      | LVYAVEFSHRSGRDL        | 466.2                        | 21658.7                      | 1284.4                       |
|          | 194      | HRSGRDLINLAKKRT        | 385.0                        | 22684.5                      | 1421.1                       |
|          | 195      | RSGRDLINLAKKRTN        | 181.6                        | 23578.4                      | 1106.2                       |
|          | 196      | SGRDLINLAKKRTNI        | 108.3                        | 24642.8                      | 689.9                        |
|          | 197      | <b>GRDLINLAKKRTNII</b> | <b>81.2</b>                  | <b>24260.5</b>               | <b>131.0</b>                 |
| AA       | 198      | RDLINLAKKRTNIIP        | 88.1                         | 24504.6                      | 119.5                        |
|          | 199      | DLINLAKKRTNIIPV        | 116.0                        | 21083.4                      | 83.3                         |
|          | 200      | LINLAKKRTNIIPVI        | 124.4                        | 14049.4                      | 50.2                         |
|          | 201      | INLAKKRTNIIPVIE        | 361.8                        | 12731.9                      | 55.4                         |
|          | 217      | ARHPHKYRMLIAMVD        | 438.2                        | 10118.4                      | 725.3                        |
|          | 218      | RHPHKYRMLIAMVDV        | 342.1                        | 7057.2                       | 520.4                        |
|          | 219      | HPHKYRMLIAMVDVI        | 322.0                        | 3925.2                       | 236.0                        |
|          | 220      | PHKYRMLIAMVDVIF        | 312.9                        | 3051.9                       | 215.8                        |
|          | 221      | HKYRMLIAMVDVIFA        | 258.1                        | 2138.2                       | 167.5                        |
|          | 222      | KYRMLIAMVDVIFAD        | 303.3                        | 2100.7                       | 197.0                        |
|          | 239      | QPDQTRIVALNAHTF        | 485.1                        | 9365.3                       | 53.4                         |
|          | 240      | PDQTRIVALNAHTFL        | 294.7                        | 7407.5                       | 23.5                         |
|          | 241      | DQTRIVALNAHTFLR        | 202.7                        | 7323.3                       | 18.1                         |
|          | 242      | QTRIVALNAHTFLRN        | 169.6                        | 7269.3                       | 17.6                         |
|          | 243      | TRIVALNAHTFLRNG        | 197.6                        | 8079.4                       | 20.3                         |
|          | 244      | RIVALNAHTFLRNGG        | 265.1                        | 9136.4                       | 25.5                         |
|          | 255      | RNGGHFVISIKANCI        | 269.0                        | 8703.3                       | 35.4                         |
|          | 256      | NGGHFVISIKANCID        | 280.2                        | 8921.2                       | 33.4                         |
|          | 257      | GGHFVISIKANCIDS        | 243.7                        | 8594.8                       | 30.1                         |
|          | 258      | GHFVISIKANCIDST        | 268.2                        | 7873.6                       | 28.8                         |
|          | 259      | HFVISIKANCIDSTA        | 370.3                        | 7776.0                       | 31.6                         |
|          | 306      | HAVVVGVYRPPPKVK        | 466.8                        | 20434.6                      | 1590.8                       |

Table S11. (A) Predicted immunodominant peptides in Centromere Protein A; peptide in red shown in the manuscript in Figure 5. (LD=linkage disequilibrium)

| Ancestry | ACA+ SSc Subset (CENPA) |                       |               |                              |               |
|----------|-------------------------|-----------------------|---------------|------------------------------|---------------|
|          | Peptide                 | Affinity (nM)         |               |                              | in tight LD   |
|          |                         | Position              | Sequence      | <i>DRA1*01:01/DRB1*07:01</i> |               |
| EA       | 48                      | LKEIRKLQKSTHLLI       | 93.0          | 8523.5                       | 68.4          |
|          | 49                      | KEIRKLQKSTHLLIR       | 77.1          | 7917.4                       | 57.1          |
|          | 50                      | EIRKLQKSTHLLIRK       | 78.0          | 7992.8                       | 60.5          |
|          | 51                      | IRKLQKSTHLLIRKL       | 68.5          | 6146.3                       | 56.1          |
|          | 52                      | RKLQKSTHLLIRKLP       | 86.8          | 6388.9                       | 77.2          |
|          | 53                      | KLQKSTHLLIRKLPF       | 127.2         | 4942.0                       | 105.9         |
|          | 54                      | LQKSTHLLIRKLPFS       | 237.8         | 4827.6                       | 142.8         |
|          | 55                      | QKSTHLLIRKLPFSR       | 467.8         | 5302.3                       | 140.4         |
|          | 56                      | KSTHLLIRKLPFSRL       | 203.0         | 3881.7                       | 68.2          |
|          | 57                      | STHLLIRKLPFSRLA       | 188.1         | 3895.0                       | 51.2          |
|          | 58                      | THLLIRKLPFSRLAR       | 181.8         | 4310.4                       | 44.4          |
|          | 59                      | HLLIRKLPFSRLARE       | 211.8         | 4498.2                       | 48.6          |
|          | 60                      | LLIRKLPFSRLAREI       | 222.9         | 4538.8                       | 54.5          |
|          | 61                      | LIRKLPFSRLAREIC       | 321.5         | 4876.5                       | 85.7          |
|          | 62                      | IRKLPFSRLAREICV       | 378.2         | 4487.2                       | 124.9         |
|          | 63                      | RKLPFSRLAREICVK       | 456.5         | 5468.0                       | 141.4         |
|          | 64                      | KLPFSRLAREICVKF       | 391.3         | 4588.5                       | 121.0         |
|          | 65                      | LPFSRLAREICVKFT       | 459.3         | 5060.8                       | 134.7         |
|          | 70                      | LAREICVKFTRGVDF       | 181.91        | 6722.66                      | 430.14        |
|          | 71                      | AREICVKFTRGVDFN       | 143.5         | 6184.14                      | 330.53        |
|          | 72                      | REICVKFTRGVDFNW       | 115.22        | 3606.71                      | 259.57        |
|          | 73                      | EICVKFTRGVDFNWQ       | 123.03        | 3264.66                      | 252.81        |
|          | 74                      | ICVKFTRGVDFNWQA       | 130.89        | 2920.06                      | 243.49        |
|          | 75                      | CVKFTRGVDFNWQAQ       | 211.61        | 2645.54                      | 327.23        |
|          | 76                      | VKFTRGVDFNWQAQA       | 416.33        | 2178.19                      | 448.15        |
|          | 78                      | FTRGVDFNWQAQALL       | 447.63        | 540.61                       | 187.33        |
|          | 79                      | TRGVDFNWQAQALLA       | 296.61        | 477.89                       | 78.89         |
|          | 80                      | RGVDFNWQAQALLAL       | 175.7         | 357.28                       | 48.24         |
|          | 81                      | GVDNFWQAQALLALQ       | 186.48        | 433.62                       | 42.93         |
|          | 82                      | VDFNFWQAQALLALQE      | 225.37        | 498.32                       | 49.91         |
|          | 83                      | DFNFWQAQALLALQEA      | 297.42        | 657.02                       | 60.8          |
|          | 84                      | FNWQAQALLALQEAA       | 424.77        | 919.85                       | 72.45         |
|          | 88                      | AQALLALQEAAEAFV       | 499.45        | 735.43                       | 24.84         |
|          | 89                      | QALLALQEAAEAFVH       | 251.33        | 718.16                       | 21.3          |
|          | 90                      | ALLALQEAAEAFVHL       | 247.9         | 907.73                       | 24.72         |
|          | 91                      | LLALQEAAEAFVHLF       | 222.56        | 972.33                       | 32.62         |
|          | 92                      | LALQEAAEAFVHLFE       | 222.81        | 604.19                       | 66.65         |
|          | 93                      | ALQEAAEAFVHLFE        | 326.61        | 435.3                        | 204.64        |
|          | 94                      | <b>LQEAAEAFVHLFED</b> | <b>445.81</b> | <b>304.33</b>                | <b>299.55</b> |
|          | 97                      | AAEAFVHLFEDAYL        | 477.35        | 61.41                        | 171.15        |
|          | 98                      | AEAFVHLFEDAYLL        | 326.8         | 51.99                        | 106.63        |
|          | 99                      | EAFVHLFEDAYLLT        | 310.85        | 52.9                         | 90.65         |
|          | 100                     | AFLVHLFEDAYLLTL       | 267.15        | 55.82                        | 82.51         |
|          | 101                     | FLVHLFEDAYLLTLH       | 314.62        | 70.32                        | 95.24         |
|          | 102                     | LVHLFEDAYLLTLHA       | 429.45        | 115.73                       | 111.14        |
|          | 104                     | HLFEDAYLLTLHAGR       | 404.46        | 873.56                       | 69.17         |
|          | 105                     | LFEDAYLLTLHAGRV       | 87.65         | 1214.72                      | 25.75         |
|          | 106                     | FEDAYLLTLHAGRVT       | 68.79         | 2011.59                      | 18.77         |
|          | 107                     | EDAYLLTLHAGRVTL       | 50.05         | 2766.4                       | 15.38         |
|          | 108                     | DAYLLTLHAGRVTLF       | 40.32         | 2062.5                       | 13.95         |
|          | 109                     | AYLLTLHAGRVTLFP       | 42.44         | 2017.48                      | 14.46         |
|          | 110                     | YLLTLHAGRVTLFPK       | 51.87         | 2284.67                      | 17.66         |
|          | 111                     | LLTLHAGRVTLFPKD       | 97.22         | 3118.21                      | 35.61         |
|          | 112                     | LTLHAGRVTLFPKDV       | 318.83        | 4232.43                      | 148.92        |

Table S11. (B) Predicted immunodominant peptides in Centromere Protein B (*LD=linkage disequilibrium*) (continued on next page).

| Ancestry | Peptide  |                   | ACA+ SSc Subset (CENPB)      |                              |                              | in tight LD |
|----------|----------|-------------------|------------------------------|------------------------------|------------------------------|-------------|
|          | Position | Sequence          | <i>DRA1*01:01/DRB1*07:01</i> | <i>DQA1*01:01/DQB1*05:01</i> | <i>DRA1*01:01/DRB1*01:01</i> |             |
|          | 3        | PKRRQLTFREKSRII   | 375.95                       | 11822.26                     | 353.19                       |             |
|          | 4        | KRRQLTFREKSRIIQ   | 316.44                       | 11434.78                     | 225.98                       |             |
|          | 5        | RRQLTFREKSRIIQE   | 352.09                       | 11172.33                     | 218.04                       |             |
|          | 6        | RQLTFREKSRIIQEV   | 290.65                       | 8483.02                      | 175.26                       |             |
|          | 7        | QLTFREKSRIIQEVE   | 419.57                       | 7673.62                      | 246.06                       |             |
|          | 30       | EIARRFNIPPSTLST   | 495.35                       | 3670.44                      | 104.18                       |             |
|          | 31       | IARRFNIPPSTLSTI   | 313.12                       | 5271.36                      | 62.96                        |             |
|          | 32       | ARRFNIPPSTLSTIL   | 253.04                       | 8886.34                      | 52.78                        |             |
|          | 33       | RRFNIPPSTLSTILK   | 294.55                       | 15951.31                     | 62.32                        |             |
|          | 34       | RFNIPPSTLSTILKN   | 497.14                       | 15988.46                     | 118.19                       |             |
|          | 39       | PSTLSTILKNKRAIL   | 467.87                       | 13153.38                     | 93.81                        |             |
|          | 40       | STLSTILKNKRAILA   | 344.35                       | 10784.31                     | 56.92                        |             |
|          | 41       | TLSTILKNKRAILAS   | 338.26                       | 10203.69                     | 47.51                        |             |
|          | 42       | LSTILKNKRAILASE   | 393.67                       | 9622.73                      | 50.87                        |             |
|          | 43       | STILKNKRAILASER   | 444.64                       | 9850.9                       | 57.54                        |             |
|          | 68       | TNKLSPYDKLEGLLI   | 307.16                       | 4395.45                      | 91.01                        |             |
|          | 69       | NKLSPYDKLEGLLIA   | 212.84                       | 3614.64                      | 43.45                        |             |
|          | 70       | KLSPYDKLEGLLIAW   | 193.34                       | 3322.86                      | 34.99                        |             |
|          | 71       | LSPYDKLEGLLIAWF   | 166.91                       | 2104.14                      | 30.51                        |             |
|          | 72       | SPYDKLEGLLIAWFQ   | 203.33                       | 1718.01                      | 34.41                        |             |
|          | 73       | PYDKLEGLLIAWFQQ   | 263.81                       | 1137.75                      | 43.55                        |             |
|          | 74       | YDKLEGLLIAWFQQI   | 407.91                       | 528.68                       | 74.25                        |             |
|          | 77       | LEGLLIAWFQQIRAA   | 442.11                       | 211.2                        | 121.31                       |             |
|          | 78       | EGLLIAWFQQIRAAAG  | 434.52                       | 249.2                        | 94.61                        |             |
|          | 79       | GLLIAWFQQIRAAAGL  | 25.94                        | 279.05                       | 12.04                        |             |
|          | 80       | LLIAWFQQIRAAAGLP  | 25.38                        | 373.15                       | 9.69                         |             |
|          | 81       | LIAWFQQIRAAAGLPV  | 19.47                        | 663.45                       | 8.11                         |             |
|          | 82       | IAWFQQIRAAAGLPVK  | 19.03                        | 1687.92                      | 7.39                         |             |
|          | 83       | AWFQQIRAAAGLPVKG  | 22.38                        | 4397.83                      | 7.83                         |             |
|          | 84       | WFQQIRAAAGLPVKG   | 25.76                        | 5498.38                      | 8.55                         |             |
|          | 85       | FQQIRAAAGLPVKGII  | 47.03                        | 6598.28                      | 12.74                        |             |
|          | 86       | QQIRAAAGLPVKGIIIL | 151.25                       | 8575.58                      | 38.69                        |             |
|          | 87       | QIRAAAGLPVKGIIILK | 212.26                       | 9471.19                      | 61.41                        |             |
|          | 88       | IRAAGLPVKGIIILKE  | 364.96                       | 11466.5                      | 120.22                       |             |
| EA       | 89       | RAAGLPVKGIIILKEK  | 389.85                       | 12931.13                     | 125.73                       |             |
|          | 93       | LPVKGIIILKEKALRI  | 91.31                        | 7369.78                      | 37.98                        |             |
|          | 94       | PVKGIIILKEKALRIA  | 73.42                        | 6923.9                       | 21.76                        |             |
|          | 95       | VKGIIILKEKALRIAE  | 82.33                        | 6914.17                      | 21.17                        |             |
|          | 96       | KGIILKEKALRIAE    | 96.42                        | 5246.95                      | 22.59                        |             |
|          | 97       | GIIILKEKALRIAEEL  | 133.48                       | 3609.48                      | 29.39                        |             |
|          | 98       | IILKEKALRIAEELG   | 197.54                       | 3621.92                      | 44.93                        |             |
|          | 99       | ILKEKALRIAEELGM   | 397.54                       | 2672.15                      | 121.47                       |             |
|          | 111      | LGMDDFTASNGWLDR   | 366.99                       | 5049.29                      | 393.27                       |             |
|          | 112      | GMDDFTASNGWLDRF   | 231.32                       | 3800.53                      | 233.65                       |             |
|          | 113      | MDDFTASNGWLDRFR   | 205.27                       | 2887.85                      | 180.47                       |             |
|          | 114      | DDFTASNGWLDRFR    | 282.66                       | 2939.08                      | 249.32                       |             |
|          | 115      | DFTASNGWLDRFR     | 305.7                        | 2927.53                      | 274.66                       |             |
|          | 128      | RRHGVVSCSGVARAR   | 488.78                       | 13005.77                     | 127.13                       |             |
|          | 129      | RHGVVSCSGVARARA   | 465.62                       | 11914.08                     | 105                          |             |
|          | 133      | VSCSGVARARARNAA   | 494.88                       | 16283.33                     | 92.98                        |             |
|          | 186      | YASQDVFSATETSLW   | 489.38                       | 5457.13                      | 354.48                       |             |
|          | 187      | ASQDVFSATETSLWY   | 261.92                       | 5093.95                      | 368.91                       |             |
|          | 188      | SQDVFSATETSLWYD   | 359.7                        | 5261.22                      | 460                          |             |
|          | 189      | QDVFSATETSLWYDF   | 279.01                       | 3574.89                      | 410.28                       |             |
|          | 197      | TSLWYDFLPDQAAGL   | 492.06                       | 206.96                       | 99.15                        |             |
|          | 198      | SLWYDFLPDQAAGLC   | 426.88                       | 335.29                       | 75.43                        |             |
|          | 199      | LWYDFLPDQAAGLCC   | 480.42                       | 907.77                       | 72.19                        |             |
|          | 266      | KGGVTTQALAKYLKA   | 497.63                       | 10583.06                     | 165.87                       |             |
|          | 267      | GGVTTQALAKYLKAL   | 403.36                       | 7981.26                      | 134.97                       |             |
|          | 268      | GVTQALAKYLKALD    | 471.8                        | 4837.88                      | 159.07                       |             |
|          | 269      | VTTQALAKYLKALD    | 485.14                       | 3868.99                      | 112.51                       |             |
|          | 271      | TQALAKYLKALDTRM   | 239.47                       | 2736.25                      | 33.03                        |             |
|          | 272      | QALAKYLKALDTRMA   | 134.65                       | 2182.63                      | 16.75                        |             |
|          | 273      | ALAKYLKALDTRMAA   | 105.21                       | 2054.29                      | 11.96                        |             |
|          | 274      | LAKYLKALDTRMAAE   | 118.34                       | 2361.04                      | 12.03                        |             |
|          | 275      | AKYLKALDTRMAAES   | 145.1                        | 3183.59                      | 13.11                        |             |
|          | 276      | KYLKALDTRMAAESR   | 182.77                       | 3584.34                      | 15.46                        |             |
|          | 277      | YLKALDTRMAAESRR   | 338.52                       | 4806.47                      | 24.49                        |             |
|          | 280      | ALDTRMAAESRRVLL   | 278.71                       | 10228.89                     | 157.6                        |             |

Table S11. (B) Predicted immunodominant peptides in Centromere Protein B (continued). (LD=linkage disequilibrium)

| Ancestry | Peptide | ACA+ SSc Subset (CENPB) |                              |                              | in tight LD                  |
|----------|---------|-------------------------|------------------------------|------------------------------|------------------------------|
|          |         | Position                | Sequence                     | Affinity (nM)                |                              |
|          |         |                         | <i>DRA1*01:01/DRB1*07:01</i> | <i>DQA1*01:01/DQB1*05:01</i> | <i>DRA1*01:01/DRB1*01:01</i> |
|          | 281     | LDRMAAESRRVLLL          | 189.26                       | 7053.35                      | 119.67                       |
|          | 282     | DTRMAAESRRVLLLA         | 253.76                       | 6448.37                      | 155.62                       |
|          | 283     | TRMAAESRRVLLLAG         | 271.95                       | 6781.77                      | 162.24                       |
|          | 284     | RMAAESRRVLLLAGR         | 462.1                        | 7047.09                      | 247.82                       |
|          | 286     | AAESRRVLLLAGRLA         | 294.88                       | 4448.08                      | 32.83                        |
|          | 287     | AESRRVLLLAGRLAA         | 224.95                       | 3290.41                      | 21.79                        |
|          | 288     | ESRRVLLLAGRLAAQ         | 219.73                       | 2792.3                       | 19                           |
|          | 289     | SRRVLLLAGRLAAQS         | 220.31                       | 2624.69                      | 17.81                        |
|          | 290     | RRVLLLAGRLAAQSL         | 215.46                       | 2156.01                      | 18.77                        |
|          | 291     | RVLLLAGRLAAQSLD         | 339.9                        | 2577.05                      | 27.83                        |
|          | 303     | SLDTSGLRHVQLAFF         | 360.21                       | 2363.32                      | 304.03                       |
|          | 304     | LDTSGLRHVQLAFFP         | 418.89                       | 2067.42                      | 268.87                       |
|          | 305     | DTSGLRHVQLAFFPP         | 472.25                       | 1953.07                      | 271.5                        |
|          | 306     | TSGLRHVQLAFFPPG         | 484.4                        | 1499.69                      | 221.7                        |
|          | 308     | GLRHVQLAFFPPGTV         | 353.72                       | 971.76                       | 148.15                       |
|          | 309     | LRHVQLAFFPPGTVH         | 347.36                       | 1057.65                      | 125.13                       |
|          | 310     | RHVQLAFFPPGTVHP         | 397                          | 1305.75                      | 140.51                       |
|          | 311     | HVQLAFFPPGTVHPL         | 246.97                       | 1508.04                      | 106.6                        |
|          | 312     | VQLAFFPPGTVHPLE         | 282.31                       | 2011.51                      | 115.43                       |
|          | 313     | QLAFFPPGTVHPLER         | 353.21                       | 4171.78                      | 122.41                       |
|          | 329     | VVQVKGHYRQAMLL          | 467.92                       | 4876.61                      | 228.62                       |
|          | 330     | VQVKGHYRQAMLLK          | 467.28                       | 4830.82                      | 194.9                        |
|          | 331     | QQVKGHYRQAMLLK          | 242.82                       | 4250.51                      | 53.26                        |
|          | 332     | QVKGHYRQAMLLKAM         | 179.93                       | 3845.08                      | 31.66                        |
|          | 333     | VKGHYRQAMLLKAMA         | 167.77                       | 3934.94                      | 23.24                        |
|          | 334     | KGHYRQAMLLKAMAA         | 147.21                       | 3419.21                      | 17.13                        |
|          | 335     | GHYRQAMLLKAMAAL         | 152.47                       | 2837.92                      | 15.35                        |
|          | 336     | HYRQAMLLKAMAAL          | 147.18                       | 2037.68                      | 15.03                        |
|          | 337     | YRQAMLLKAMAAL           | 153.59                       | 1958.19                      | 13.61                        |
|          | 338     | RQAMLLKAMAAL            | 162.71                       | 2037.84                      | 12.87                        |
|          | 339     | QAMLLKAMAAL             | 224.18                       | 2248.26                      | 14.86                        |
|          | 340     | AMLLKAMAAL              | 280.36                       | 2439.41                      | 16.68                        |
|          | 341     | MLLKAMAAL               | 382.12                       | 2788.16                      | 21.12                        |
|          | 353     | DPSGLQLGLTEALHF         | 75.41                        | 1973.12                      | 61.73                        |
| EA       | 354     | PSGLQLGLTEALHFV         | 45.14                        | 1408.73                      | 38.76                        |
|          | 355     | SGLQLGLTEALHFVA         | 37.17                        | 1262.23                      | 33.01                        |
|          | 356     | GLQLGLTEALHFVAA         | 34.65                        | 1236.62                      | 33.48                        |
|          | 357     | LQLGLTEALHFVAAA         | 40.73                        | 1241.73                      | 44.3                         |
|          | 358     | QLGLTEALHFVAAA          | 61.12                        | 914.02                       | 66.47                        |
|          | 359     | LGLTEALHFVAAWQ          | 121.87                       | 875.41                       | 97.8                         |
|          | 360     | GLTEALHFVAAWQA          | 161.26                       | 838.91                       | 61.96                        |
|          | 361     | LTEALHFVAAWQAV          | 53.13                        | 683.6                        | 26                           |
|          | 362     | TEALHFVAAWQAVE          | 52.96                        | 659.3                        | 21.74                        |
|          | 363     | EALHFVAAWQAVEP          | 57.93                        | 603.24                       | 21.78                        |
|          | 364     | ALHFVAAWQAVEPS          | 63.45                        | 618.86                       | 22.45                        |
|          | 365     | LHFVAAWQAVEPSD          | 89.03                        | 826.93                       | 28.39                        |
|          | 366     | HFVAAWQAVEPSDI          | 114.93                       | 890.53                       | 45.34                        |
|          | 367     | FVAAWQAVEPSDIA          | 201.46                       | 1046.22                      | 96.05                        |
|          | 368     | VAAWQAVEPSDIAA          | 256.34                       | 1990.64                      | 138.31                       |
|          | 369     | AAWQAVEPSDIAAC          | 308.33                       | 3606.79                      | 164.34                       |
|          | 370     | AAWQAVEPSDIAACF         | 380.43                       | 5990.71                      | 204.19                       |
|          | 538     | EVPVPSFGEAMAYFA         | 348.08                       | 3153.32                      | 146.22                       |
|          | 539     | VPVPSFGEAMAYFAM         | 181.1                        | 2399.13                      | 65.53                        |
|          | 540     | PVPSFGEAMAYFAMV         | 125.36                       | 1206.91                      | 46.1                         |
|          | 541     | VPSFGEAMAYFAMVK         | 105.57                       | 883.58                       | 36.01                        |
|          | 542     | PSFGEAMAYFAMVKR         | 119.34                       | 705.1                        | 39.17                        |
|          | 543     | SFGEAMAYFAMVKRY         | 128.18                       | 566.98                       | 44.58                        |
|          | 544     | FGEAMAYFAMVKRYL         | 119.08                       | 535.35                       | 50.39                        |
|          | 545     | GEAMAYFAMVKRYLT         | 97.64                        | 698.09                       | 43.9                         |
|          | 546     | EAMAYFAMVKRYLTS         | 96.14                        | 891.11                       | 36.51                        |
|          | 547     | AMAYFAMVKRYLTSF         | 93.24                        | 1466.01                      | 32.8                         |
|          | 548     | MAYFAMVKRYLTSFP         | 107.41                       | 2142.15                      | 36.81                        |
|          | 549     | AYFAMVKRYLTSFPI         | 46.74                        | 1850.09                      | 28.5                         |
|          | 550     | YFAMVKRYLTSFPID         | 54.2                         | 1556.56                      | 31.19                        |
|          | 551     | FAMVKRYLTSFPIDD         | 69.94                        | 927.84                       | 45.09                        |
|          | 552     | AMVKRYLTSFPIDDR         | 70.67                        | 620.35                       | 39.94                        |
|          | 553     | MVKRYLTSFPIDDRV         | 69.52                        | 424.57                       | 37.95                        |
|          | 554     | VKRYLTSFPIDDRVQ         | 88.71                        | 453.78                       | 46.03                        |
|          | 555     | KRYLTSFPIDDRVQS         | 156.74                       | 524.42                       | 77.53                        |

**Table S12. Bioinformatically derived immunodominant peptides and homologous viral protein identification. (A) Peptide sequences from microbial proteins homologous to topoisomerase I immunodominant peptide; (B) Peptide sequences from microbial proteins homologous to fibrillarlin immunodominant peptide; and (C) Peptide sequences from microbial proteins homologous to CENPA immunodominant peptide.**

| A                    |                      |                |          |            |          | Topoisomerase I |   |   |   |   |   |   |   |   |   |   |   |   |   |
|----------------------|----------------------|----------------|----------|------------|----------|-----------------|---|---|---|---|---|---|---|---|---|---|---|---|---|
| Source               | Protein              | NCBI Accession | E-Value  | % Homology | Sequence |                 |   |   |   |   |   |   |   |   |   |   |   |   |   |
| Human                | Topoisomerase I      | AAL10791       | -        | 100        | R        | Q               | R | A | V | A | L | Y | F | I | D | K | L | A | L |
| Hokovirus HKV1       | DNA topoisomerase IB | ARF10236.1     | 0.000003 | 93         | R        | Q               | I | A | V | A | L | Y | F | I | D | K | L | A | L |
| Megavirus chiliensis | DNA topoisomerase 1b | YP_004894910.1 | 0.003    | 80         | R        | Q               | I | A | T | A | L | Y | F | I | D | K | F | A | L |
| Megavirus vitis      | DNA topoisomerase 1b | AVL94169.1     | 0.003    | 80         | R        | Q               | I | A | T | A | L | Y | F | I | D | K | F | A | L |
| Powai lake megavirus | Hypothetical protein | ANB50940.1     | 0.003    | 80         | R        | Q               | I | A | T | A | L | Y | F | I | D | K | F | A | L |
| Klosneuvirus KNV1    | DNA topoisomerase IB | ARF11421.1     | 0.003    | 80         | R        | Q               | I | A | T | A | L | Y | F | I | D | K | F | A | L |
| Catovirus CTV1       | DNA topoisomerase IB | ARF08721.1     | 0.013    | 80         | R        | Q               | I | A | T | A | L | Y | F | I | D | K | F | A | L |

  

| B                                  |                                 |                |         |            |          | Fibrillarlin |   |   |   |   |   |   |   |    |   |   |   |   |   |
|------------------------------------|---------------------------------|----------------|---------|------------|----------|--------------|---|---|---|---|---|---|---|----|---|---|---|---|---|
| Source                             | Protein                         | NCBI Accession | E-Value | % Homology | Sequence |              |   |   |   |   |   |   |   |    |   |   |   |   |   |
| Human                              | Fibrillarlin                    | EAW56925       | -       | 100        | G        | R            | D | L | I | N | L | A | K | K  | R | T | N | I | I |
| Acanthamoeba polyphaga moomouvirus | Cell division cycle 123 protein | YP_007354044.1 | 0.004   | 65         | D        | L            | I | N | L | A | K | K | I | -- | N | N | I | I |   |
| Saudi moomouvirus                  | Cell division cycle             | AQN67932       | 0.004   | 65         | D        | L            | I | N | L | A | K | K | I | -- | N | N | I | I |   |
| Moomouvirus Monve                  | Hypothetical protein mv_R1060   | AEX63262       | 0.004   | 65         | D        | L            | I | N | L | A | K | K | I | -- | N | N | I | I |   |

  

| C                           |                                 |                |         |            |          | CENPA |   |   |   |   |   |   |   |   |   |   |   |   |   |
|-----------------------------|---------------------------------|----------------|---------|------------|----------|-------|---|---|---|---|---|---|---|---|---|---|---|---|---|
| Source                      | Protein                         | NCBI Accession | E-Value | % Homology | Sequence |       |   |   |   |   |   |   |   |   |   |   |   |   |   |
| Human                       | Centromere protein A            | AAH02703       | -       | 100        | L        | Q     | E | A | A | E | A | F | L | V | H | L | F | E | D |
| Dishui lake phycodnavirus 1 | Hypothetical protein DSLPV1_013 | YP_009465730.1 | 0.01    | 80         | L        | Q     | E | A | A | E | A | Y | L | T | S | L | F | E | D |

Exact match  
 Conservative amino acid substitution

Table S13. (A) Fifty 15-mer Random sequence peptides generated using ExPASy compared with viral sequence database for homology.

<https://web.expasy.org/randseq/>

| Peptide Sequence | Number of Results       |                              | Results with E-value <1             |         |
|------------------|-------------------------|------------------------------|-------------------------------------|---------|
|                  | Viruses with E-value <1 | Mimiviridae with E-value <10 | Virus                               | E-Value |
| VKFIQNSEALDRGPT  | 0                       | 0                            |                                     |         |
| EIVTSAPKNQGFRLD  | 0                       | 0                            |                                     |         |
| SQLPARDTGKEVINP  | 0                       | 0                            |                                     |         |
| EINSTPGQAVKLFRLD | 0                       | 0                            |                                     |         |
| TKRLPSNEAFIDGQV  | 0                       | 0                            |                                     |         |
| FPASGEKRINTLVQD  | 0                       | 0                            |                                     |         |
| KLGDPNISIATFVERQ | 0                       | 0                            |                                     |         |
| SRVPAKDFLQNGIET  | 0                       | 0                            |                                     |         |
| SITARQEKPNIPLFDG | 0                       | 0                            |                                     |         |
| VQGRSDLIENFAPK   | 0                       | 0                            |                                     |         |
| DKVEQATRFPGSLNI  | 0                       | 0                            |                                     |         |
| KIGAPEQNVLDTFSR  | 0                       | 0                            |                                     |         |
| ADLSTFRQKIGNVPE  | 1                       | 0                            | Turkeypox virus                     | 0.61    |
| FGLKNTRAPEQVIDS  | 0                       | 0                            |                                     |         |
| IEFVPSTKQLGARDN  | 0                       | 0                            |                                     |         |
| IVANEDPSGKFTLRQ  | 0                       | 0                            |                                     |         |
| KDGLPQEFITRSNAV  | 0                       | 0                            |                                     |         |
| KNRAVPTQSDELIGF  | 0                       | 0                            |                                     |         |
| NQDKPRAVESFITLG  | 0                       | 0                            |                                     |         |
| FLVQIDNAPGKRSET  | 0                       | 0                            |                                     |         |
| NVISLPKGAETFQRD  | 0                       | 0                            |                                     |         |
| QRNEIDGATVLPKFS  | 1                       | 0                            | Streptomyces phage                  | 0.93    |
| NALDVRISQEKPTFG  | 0                       | 0                            |                                     |         |
| SQFPITRLENKVDGA  | 0                       | 0                            |                                     |         |
| FRITNKDGSAPQLVE  | 0                       | 0                            |                                     |         |
| LTKSVIDGPENFQAR  | 0                       | 0                            |                                     |         |
| QNFVDRDGLSTKIAP  | 0                       | 0                            |                                     |         |
| IQVGFNKAEPDLTRS  | 0                       | 0                            |                                     |         |
| EGNFLTSPRIQADVK  | 2                       | 0                            | Hepacivirus F<br>Rodent hepacivirus | 0.66    |
| ELANKTFDSPRQGVV  | 1                       | 0                            | Hepatitis C virus subtype 1b        | 0.33    |
| QFSEIPRTVANDLGK  | 0                       | 0                            |                                     |         |
| AEIPTDLFQGKNSVR  | 0                       | 0                            |                                     |         |
| TGRKDFEIQPSLVAN  | 0                       | 0                            |                                     |         |
| PAEINKVTFSDGQLR  | 0                       | 0                            |                                     |         |
| SGFRALVKITPNEDQ  | 0                       | 0                            |                                     |         |
| ERNDATFILKGPQVS  | 0                       | 0                            |                                     |         |
| TNAISQFRGLDKPEV  | 0                       | 0                            |                                     |         |
| TAVNREQGFISDLKP  | 0                       | 0                            |                                     |         |
| AVEDGPPQFKSLIRNT | 0                       | 0                            |                                     |         |
| DQKAGELVTRPFNIS  | 0                       | 0                            |                                     |         |
| DNEVKIPSTRAQGLF  | 0                       | 0                            |                                     |         |
| VGPFTLENADKQISR  | 0                       | 0                            |                                     |         |
| SQVDPTRFNLNIGEAK | 0                       | 0                            |                                     |         |
| ASGNLPTVQDKIFER  | 0                       | 0                            |                                     |         |
| QKFAPISLTGERVDN  | 0                       | 0                            |                                     |         |
| NGFLTVEPIDSRQKA  | 0                       | 0                            |                                     |         |
| RADITVQSEKFNGLP  | 0                       | 0                            |                                     |         |
| FLGDETPQNRIVAKS  | 0                       | 0                            |                                     |         |
| EFKDTGANIQSPRLV  | 0                       | 0                            |                                     |         |
| TPKQLNEAVRISDGF  | 1                       | 0                            | Human immunodeficiency virus 1      | 0.33    |



Table S13. (B) Fifty 15-mer Random sequence peptides generated using SMS compared with viral sequence database for homology.

[http://www.bioinformatics.org/sms2/random\\_protein.html](http://www.bioinformatics.org/sms2/random_protein.html)

| Peptide Sequence  | Number of Results       |                              | Results with E-value <1                        |         |
|-------------------|-------------------------|------------------------------|------------------------------------------------|---------|
|                   | Viruses with E-value <1 | Mimiviridae with E-value <10 | Virus                                          | E-Value |
| EAAWCSQHLDADFTH   | 0                       | 0                            |                                                |         |
| DKNWFMLKLGKVVITG  | 0                       | 0                            |                                                |         |
| WLHDIDMCEISASMQ   | 0                       | 0                            |                                                |         |
| RGGGIGDNFCYWTGP   | 0                       | 0                            |                                                |         |
| DRVLHEWISNTPSVN   | 1                       | 0                            | Saimiriine betaherpesvirus 4                   | 0.61    |
| CYIGHGTGKLRIRLC   | 0                       | 0                            |                                                |         |
| KFERHHDAYLWVYIE   | 0                       | 0                            |                                                |         |
| ENKTTMNPAAATPDPS  | 0                       | 0                            |                                                |         |
| ICIPQYMPATSKIQ    | 2                       | 0                            | Escherichia phage EcS1<br>Serratia phage CHI14 | 0.43    |
| SAACVPSVKVSIMPC   | 0                       | 0                            |                                                |         |
| DSNSRKVCQYSQCMG   | 0                       | 0                            |                                                |         |
| EWAWNRDGIISHYIAM  | 1                       | 0                            | Pithovirus sibericum                           | 0.87    |
| QFSWPDSLGMPTAKS   | 0                       | 0                            |                                                |         |
| MWKYGHGHDITGNFSTC | 0                       | 0                            |                                                |         |
| AHFVAEIVQSFFPIG   | 0                       | 0                            |                                                |         |
| RPFKYMGMFHQHWLQ   | 0                       | 0                            |                                                |         |
| STHDFMATLFCDGSS   | 0                       | 0                            |                                                |         |
| ENWDSNHICYGRHYQL  | 0                       | 0                            |                                                |         |
| DSKYMTFLAICANCS   | 0                       | 0                            |                                                |         |
| CNHCCFWEPKRGLLP   | 0                       | 0                            |                                                |         |
| ETFGPLNPLANTQEW   | 0                       | 0                            |                                                |         |
| AMIFCLRHEASFSP    | 0                       | 0                            |                                                |         |
| VKFMWHLRAHIFRA    | 0                       | 0                            |                                                |         |
| QPDFWKSYPQPKLQ    | 0                       | 0                            |                                                |         |
| CISPYFESTGACPTF   | 1                       | 0                            | Aphis glycines virus 3                         | 0.33    |
| KDATIVDHSVCTVVWQ  | 0                       | 0                            |                                                |         |
| NIAMDGLAMSLKARR   | 0                       | 0                            |                                                |         |
| CSDFPHIRGLVILLP   | 0                       | 0                            |                                                |         |
| RPYKSDHHILCAKNS   | 0                       | 0                            |                                                |         |
| DHKIKYLSSYYTDPN   | 0                       | 0                            |                                                |         |
| QNLQQPKCHTEFVDF   | 0                       | 0                            |                                                |         |
| MTYMDRNNNEVELTK   | 1                       | 0                            | Cyanophage S-RIM14                             | 0.93    |
| TKGTWRRGPMARWES   | 0                       | 0                            |                                                |         |
| PYNKWMSDSDRMTNR   | 0                       | 0                            |                                                |         |
| TSAHMHCKAGKDALE   | 0                       | 0                            |                                                |         |
| RWHVMVNWLYIADDG   | 0                       | 0                            |                                                |         |
| GTEICPMIVYHFIWW   | 1                       | 0                            | White spot syndrome virus                      | 0.33    |
| YYTWAQPGKRKCSET   | 0                       | 0                            |                                                |         |
| WFMWVPAEMQRWHRV   | 0                       | 0                            |                                                |         |
| CFSQHPNMSRPYMSA   | 0                       | 0                            |                                                |         |
| IYVEPTIWSARKHLG   | 0                       | 0                            |                                                |         |
| GGLVTWYAFRDMTDY   | 0                       | 0                            |                                                |         |
| SPVANHIMPPTFYNG   | 0                       | 0                            |                                                |         |
| CGGLNELIEWQPPFE   | 0                       | 0                            |                                                |         |
| CVNQGYVHFLHYQWC   | 0                       | 0                            |                                                |         |
| GFSPTYSHEENWVAI   | 0                       | 0                            |                                                |         |
| RCEDPLTILHPAKLC   | 0                       | 0                            |                                                |         |
| EFPHIMIAHWGAGGM   | 0                       | 0                            |                                                |         |
| FDSPKELDPTNNDRR   | 0                       | 0                            |                                                |         |
| ATRNMPFRTSCDV     | 0                       | 0                            |                                                |         |

**Table S14. (A) BLAST results for topoisomerase I immunodominant peptide.**

| RQRAVALYFIDKLAL in Topoisomerase I                                                                                                         |             |            |
|--------------------------------------------------------------------------------------------------------------------------------------------|-------------|------------|
| Protein                                                                                                                                    | E-Value     | % Homology |
| topoisomerase (DNA) I, isoform CRA_b                                                                                                       | 0.000000006 | 100%       |
| Topoisomerase (DNA) I                                                                                                                      | 0.000000006 | 100%       |
| topoisomerase I                                                                                                                            | 0.000000006 | 100%       |
| DNA topoisomerase 1                                                                                                                        | 0.000000006 | 100%       |
| DNA topoisomerase I                                                                                                                        | 0.000000006 | 100%       |
| DNA topoisomerase I                                                                                                                        | 0.000000006 | 100%       |
| topoisomerase (DNA) I, isoform CRA_c                                                                                                       | 0.000000006 | 100%       |
| DNA topoisomerase I, mitochondrial isoform X1                                                                                              | 0.000000006 | 100%       |
| TOP1MT protein                                                                                                                             | 0.000000006 | 100%       |
| DNA topoisomerase I, mitochondrial isoform 1 precursor                                                                                     | 0.000000006 | 100%       |
| Topoisomerase (DNA) I, mitochondrial                                                                                                       | 0.000000006 | 100%       |
| mitochondrial DNA topoisomerase I                                                                                                          | 0.000000006 | 100%       |
| Chain A, Human Dna Topoisomerase I In Covalent Complex With A 22 Base Pair Dna Duplex                                                      | 0.000000006 | 100%       |
| Chain A, Human Dna Topoisomerase I (70 Kda) In Complex With The Indolocarbazole Sa315f And Covalent Complex With A 22 Base Pair Dna Duplex | 0.000000006 | 100%       |
| Chain A, Human Topoisomerase I (Topo70) Double Mutant K532rY723F                                                                           | 0.000000006 | 100%       |
| Chain A, Human Topoisomerase IDNA COMPLEX                                                                                                  | 0.000000006 | 100%       |
| Chain A, Human Reconstituted Dna Topoisomerase I In Covalent Complex With A 22 Base Pair Dna Duplex                                        | 0.000000006 | 100%       |
| Chain A, Structural Mechanisms Of Camptothecin Resistance By Mutations In Human Topoisomerase I                                            | 0.000000006 | 100%       |
| Chain C, Structural Mechanisms Of Camptothecin Resistance By Mutations In Human Topoisomerase I                                            | 0.000000006 | 100%       |
| Chain A, Human Dna Topoisomerase I (70 Kda) In Non-Covalent Complex With A 22 Base Pair Dna Duplex Containing An 8-Oxog Lesion             | 0.000000006 | 100%       |
| Chain A, Human Topoisomerase I Ara-C Complex                                                                                               | 0.000000006 | 100%       |
| Chain A, Crystal Structure Of Human Topoisomerase I Dna Complex                                                                            | 0.000000006 | 100%       |
| unnamed protein product                                                                                                                    | 0.000000006 | 100%       |
| unnamed protein product                                                                                                                    | 0.000000006 | 100%       |
| DNA topoisomerase I, mitochondrial isoform 2                                                                                               | 0.000000006 | 100%       |
| unnamed protein product                                                                                                                    | 0.000000006 | 100%       |
| unnamed protein product                                                                                                                    | 0.000000006 | 100%       |
| topoisomerase (DNA) I, mitochondrial, isoform CRA_e                                                                                        | 0.000006    | 100%       |
| topoisomerase (DNA) I, mitochondrial, isoform CRA_f                                                                                        | 0.000006    | 100%       |
| topoisomerase (DNA) I, mitochondrial, isoform CRA_c                                                                                        | 0.000006    | 100%       |
| topoisomerase (DNA) I, mitochondrial, isoform CRA_a                                                                                        | 0.000006    | 100%       |
| topoisomerase (DNA) I, mitochondrial, isoform CRA_d                                                                                        | 0.000006    | 100%       |
| topoisomerase (DNA) I, mitochondrial, isoform CRA_b                                                                                        | 0.000006    | 100%       |

**Table S14. (B) BLAST results for fibrillarin immunodominant peptide.**

| <b>GRDLINLAKKRTNII in Fibrillarin</b>                       |                |                   |
|-------------------------------------------------------------|----------------|-------------------|
| <b>Protein</b>                                              | <b>E-Value</b> | <b>% Homology</b> |
| rRNA 2'-O-methyltransferase fibrillarin                     | 0.000000008    | 100%              |
| fibrillarin                                                 | 0.000000008    | 100%              |
| rRNA 2'-O-methyltransferase fibrillarin isoform X1          | 0.000000008    | 100%              |
| FBRL_HUMAN                                                  | 0.000000008    | 100%              |
| unnamed protein product                                     | 0.000000008    | 100%              |
| rRNA 2'-O-methyltransferase fibrillarin isoform X2          | 0.000000008    | 100%              |
| Unknown (protein for IMAGE:4538098)                         | 0.000000008    | 100%              |
| Chain A, Human Fibrillarin                                  | 0.000000008    | 100%              |
| FBRL_HUMAN [AA 1- 227]                                      | 0.000000008    | 100%              |
| rRNA/tRNA 2'-O-methyltransferase fibrillarin-like protein 1 | 0.000001       | 87%               |
| hCG1641252                                                  | 0.000001       | 87%               |

**Table S14. (C) BLAST results for centromere protein A immunodominant peptide.**

| LQEAAEAFVLHFLFED in Centromere Protein A                                                                             |             |            |
|----------------------------------------------------------------------------------------------------------------------|-------------|------------|
| Protein                                                                                                              | E-Value     | % Homology |
| Chain A, Cryo-EM structure of CENP-A nucleosome in complex with kinetochore protein CENP-N                           | 0.000000004 | 100%       |
| Chain A, Structure Of A Cenp-A-Histone H4 Heterodimer In Complex With Chaperone Hjurp                                | 0.000000004 | 100%       |
| Chain A, The Structure Of The Centromeric Nucleosome Containing Cenp-A                                               | 0.000000004 | 100%       |
| histone H3-like centromeric protein A isoform a                                                                      | 0.000000004 | 100%       |
| centromere protein A, 17kDa, isoform CRA_b                                                                           | 0.000000004 | 100%       |
| Chain A, Crystal Structure Of (Cenp-AH4)2 HETEROTETRAMER                                                             | 0.000000004 | 100%       |
| Chain A, Complex Structure 6 Of DaxxH3.3(SUB7)H4                                                                     | 0.000001    | 93%        |
| Chain A, Complex Structure 3 Of DaxxH3.3(SUB5,G90A)H4                                                                | 0.000001    | 93%        |
| Chain A, Complex Structure 2 Of DaxxH3.3(SUB5,G90M)H4                                                                | 0.000001    | 93%        |
| Chain A, Complex Structure 1 Of DaxxH3.3(SUB5)H4                                                                     | 0.000001    | 93%        |
| Chain A, Crystal Structure Of Human Nucleosome Containing H3.y                                                       | 0.000006    | 80%        |
| histone cluster 2, H3c pseudogene                                                                                    | 0.000006    | 80%        |
| H3L-like histone                                                                                                     | 0.000008    | 80%        |
| histone H3-like centromeric protein A isoform b                                                                      | 0.00001     | 100%       |
| hCG1749005                                                                                                           | 0.0002      | 80%        |
| Chain E, Crystal Structure of the heterotypic nucleosome containing human CENP-A and H3.3                            | 0.0002      | 80%        |
| Chain A, The Crystal Structure Of The Nucleosome Containing H3.6                                                     | 0.0002      | 80%        |
| Chain A, The Nucleosome Structure Containing H2b-k120 And H4-k31 Monoubiquitinations                                 | 0.0002      | 80%        |
| Chain A, The Human Nucleosome Structure Containing The Histone Variant H3.3                                          | 0.0002      | 80%        |
| Chain A, The Human Nucleosome Structure Containing The Histone Variant H3.2                                          | 0.0002      | 80%        |
| histone H3.3                                                                                                         | 0.0002      | 80%        |
| Chain A, Crystal Structure Of The Nucleosome Containing Histone H3 With The Crotonylated Lysine 122                  | 0.0002      | 80%        |
| unnamed protein product                                                                                              | 0.0002      | 80%        |
| histone H3.2                                                                                                         | 0.0002      | 80%        |
| unnamed protein product                                                                                              | 0.0002      | 80%        |
| H3 histone, family 3A                                                                                                | 0.0002      | 80%        |
| Chain A, Crystal structure of EBV tegument protein BNRF1 in complex with histone chaperone DAXX and histones H3.3-H4 | 0.0002      | 80%        |
| Chain M, CryoEM Structure INO80core Nucleosome complex                                                               | 0.0002      | 80%        |
| hCG1639761                                                                                                           | 0.0002      | 80%        |
| Chain A, Crystal Structure Of Human Mcm2 Hbd And Asf1b Chaperoning A Histone H3.2-h4 Dimer                           | 0.0002      | 80%        |
| Chain A, Crystal structure of Human MCM2 HBD chaperoning a histone H3-H4 tetramer                                    | 0.0002      | 80%        |
| Chain A, Crystal Structure Of Human Nucleosome Core Particle Containing H3k122q Mutation                             | 0.001       | 80%        |
| Chain A, Crystal Structure Of Human Nucleosome Core Particle Containing H3k115q Mutation                             | 0.001       | 80%        |
| Chain A, Crystal Structure Of Human Nucleosome Core Particle Containing H3k79q Mutation                              | 0.001       | 80%        |
| Chain A, Crystal Structure Of Human Nucleosome Core Particle Containing H3k64q Mutation                              | 0.001       | 80%        |
| Chain A, Crystal Structure Of Human Nucleosome Core Particle Containing H3k56q Mutation                              | 0.001       | 80%        |
| Chain A, The Human Nucleosome Structure                                                                              | 0.001       | 80%        |
| Histone cluster 1, H3i                                                                                               | 0.001       | 80%        |
| histone H3.1                                                                                                         | 0.001       | 80%        |
| Histone cluster 1, H3i                                                                                               | 0.001       | 80%        |
| histone H3                                                                                                           | 0.001       | 80%        |
| Chain A, Crystal Structure Of The Nucleosome Core Particle                                                           | 0.001       | 80%        |
| Chain A, Crystal Structure Of Human Nucleosome Core Particle Lacking H3.1 N- Terminal Region                         | 0.001       | 80%        |
| Chain G, Crystal Structure Of Human Spt16 Mid-aid/h3-h4 Tetramer Fact Histone Complex                                | 0.001       | 80%        |
| histone cluster 2 H3 pseudogene 2                                                                                    | 0.002       | 80%        |
| Chain A, The Nucleosome Containing A Testis-Specific Histone Variant, Human H3t                                      | 0.012       | 73%        |
| Chain A, The Nucleosome Containing Human H3.5                                                                        | 0.012       | 73%        |
| histone H3.1t                                                                                                        | 0.012       | 73%        |
| Histone H3-like                                                                                                      | 0.012       | 73%        |
| histone H3.3C                                                                                                        | 0.012       | 73%        |
| hCG1789848                                                                                                           | 0.048       | 71%        |

Table S15. Predicted immunodominant peptides in other ancestries for (A) topoisomerase I and (B) centromere protein A.

**A**

| Ancestry           | ATA+ SSc Subset |                 |           | Affinity(nM)                 |
|--------------------|-----------------|-----------------|-----------|------------------------------|
|                    | Position        | Sequence        | Core      |                              |
| Japanese<br>Thai   | 473             | RQRAVALYFIDKLAL | VALYFIDKL | 299.7                        |
|                    |                 |                 |           | <i>DRA1*01:01/DRB1*15:02</i> |
|                    |                 |                 |           | <i>DPA1*02:01/DPB1*13:01</i> |
| Turkish<br>Iranian | 473             | RQRAVALYFIDKLAL | VALYFIDKL | 264.2                        |
|                    |                 |                 |           | <i>DRA1*01:01/DRB1*11:04</i> |
| Turkish<br>Iranian | 473             | RQRAVALYFIDKLAL | VALYFIDKL | 340.3                        |
|                    |                 |                 |           | <i>DRA1*01:01/DRB1*08:02</i> |
| Mexican            | 473             | RQRAVALYFIDKLAL | VALYFIDKL | 600.1                        |
|                    |                 |                 |           | <i>DRA1*01:01/DRB1*16:02</i> |
| Choctaw<br>Indian  | 473             | RQRAVALYFIDKLAL | VALYFIDKL | 268.8                        |

  

**B**

| Ancestry            | ACA+ SSc Subset |                |          | Affinity(nM)                              |
|---------------------|-----------------|----------------|----------|-------------------------------------------|
|                     | Position        | Sequence       | Core     |                                           |
| Japanese<br>Chinese | 94              | LQEAAEAFVHLFED | AEAFVHLF | 304.3                                     |
|                     |                 |                |          | <i>DQA1*03:03/DQB1*03:01</i> <sup>@</sup> |
| Japanese            | 94              | LQEAAEAFVHLFED | AEAFVHLF | 400.3                                     |
|                     |                 |                |          | <i>DQA1*05:03/DQB1*03:01</i> <sup>@</sup> |
| Japanese            | 94              | LQEAAEAFVHLFED | AEAFVHLF | 421.7                                     |
|                     |                 |                |          | <i>DQA1*06:01/DQB1*03:01</i> <sup>@</sup> |
| Japanese            | 94              | LQEAAEAFVHLFED | AEAFVHLF | 578.6                                     |

@ Three different haplotypes

## References

1. Motyer A, et al. (2016) Practical use of methods for imputation of HLA alleles from SNP genotype data. *bioRxiv*.
2. Das S, et al. (2016) Next-generation genotype imputation service and methods. *Nat Genet* 48(10):1284–87.
3. Diltthey AT, et al. (2019) Hla\*la—hla typing from linearly projected graph alignments. *Bioinformatics* 35(21):4394–4396.
4. Jia X, et al. (2013) Imputing amino acid polymorphisms in human leukocyte antigens. *PLoS One* 8(6):e64683.
5. Thomson G (1995) Hla disease associations: models for the study of complex human genetic disorders. *Critical Reviews in Clinical Laboratory Sciences* 32(2):183–219.
6. Robinson J, et al. (2015) The IPD and IMGT/HLA database: allele variant databases. *Nucleic Acids Res* 43(Database issue):D423–31.
7. Barrett JC, Fry B, Maller J, Daly MJ (2005) Haploview: analysis and visualization of LD and haplotype maps. *Bioinformatics* 21(2):263–65.
8. Pettersen EF, et al. (2004) UCSF Chimera—a visualization system for exploratory research and analysis. *J Comput Chem* 25(13):1605–12.
9. Zhang H, Bonney G (2000) Use of classification trees for association studies. *Genet Epidemiol* 19(4):323–32.
10. Brown JH, et al. (2015) Pillars article: three-dimensional structure of the human class II histocompatibility antigen HLA-DR1. *Journal of Immunology* 194(1):5–11.
11. Chicz RM, et al. (1992) Predominant naturally processed peptides bound to HLA-DR1 are derived from MHC-related molecules and are heterogeneous in size. *Nature* 358(6389):764–68.
12. Bassani-Sternberg M, et al. (2016) Direct identification of clinically relevant neoepitopes presented on native human melanoma tissue by mass spectrometry. *Nature communications* 7(13404).
13. Chong C, et al. (2018) High-throughput and Sensitive Immunopeptidomics Platform Reveals Profound Interferongamma-Mediated Remodeling of the Human Leukocyte Antigen (HLA) Ligandome. *Molecular Cell Proteomics* 17(3):533–48.
14. Ritz D, et al. (2018) Membranal and Blood-Soluble HLA Class II Peptidome Analyses Using Data-Dependent and Independent Acquisition. *Proteomics* 18(12):e1700246.
15. Collado JA, et al. (2013) Composition of the HLA-DR-associated human thymus peptidome. *European journal of immunology* 43(9):2273–82.
16. Ciudad MT, et al. (2017) Analysis of the HLA-DR peptidome from human dendritic cells reveals high affinity repertoires and nonconventional pathways of peptide generation. *Journal of Leukocyte Biology* 101(1):15–27.
17. Godkin AJ, et al. (1998) Use of complete eluted peptide sequence data from HLA-DR and -DQ molecules to predict T cell epitopes, and the influence of the nonbinding terminal regions of ligands in epitope selection. *Journal of Immunology* 161(2):850–58.
18. Breous E, Somanathan S, Wilson JM (2009) Identification of the immunodominant cytotoxic T-cell epitope of human -1 antitrypsin. *Gene Therapy* 16(11):1380–82.
19. Hartman IZ, et al. (2010) A reductionist cell-free major histocompatibility complex class II antigen processing system identifies immunodominant epitopes. *Nature Medicine* 16(11):1333–40.
20. Stickler M, et al. (2004) The HLA-DR2 haplotype is associated with an increased proliferative response to the immunodominant CD4(+) T-cell epitope in human interferon-beta. *Genes and immunity* 5(1):1–7.
21. Okhuri T, et al. (2009) Identification of novel helper epitopes of MAGE-A4 tumour antigen: useful tool for the propagation of Th1 cells. *British journal of cancer* 100(7):1135–43.
22. Zhao w, Sher X (2018) Systematically benchmarking peptide-MHC binding predictors: From synthetic to naturally processed epitopes. *PLoS computational biology* 14(11):e1006457.
23. Jensen KK, et al. (2018) Improved methods for predicting peptide binding affinity to MHC class II molecules. *Immunology* 154(3):394–406.
24. Nielsen M, et al. (2008) Quantitative predictions of peptide binding to any hla-dr molecule of known sequence: Netmhciipan. *PLoS Comput Biol* 4(7):e1000107.
25. Singh T, et al. (2018) Epitope-binding characteristics for risk versus protective DRB1 alleles for visceral leishmaniasis. *J Immunol* 200(8):2727–37.
26. Degoot AM, Chirove F, Ndifon W (2018) Trans-allelic model for prediction of peptide:MHC-II interactions. *Front Immunol* 9:1410.
27. Nielsen M, Lundegaard C, Lund O (2007) Prediction of MHC class II binding affinity using SMM-align, a novel stabilization matrix alignment method. *BMC Bioinformatics* 8:238.
28. Altschul SF, Gish W, Miller W, Myers EW, Lipman DJ (1990) Basic local alignment search tool. *J Mol Biol* 215(3):403–10.
29. Stothard P (2000) The sequence manipulation suite: JavaScript programs for analyzing and formatting protein and DNA sequences. *BioTechniques* 28(6):1102–04.
30. Artimo P, et al. (2016) ExPASy: SIB bioinformatics resource portal. *Nucleic Acids Res* 40(Web Server issue):W597–603.
31. Hogeboom C, et al. (2015) Peptide motif analysis predicts lymphocytic choriomeningitis virus as trigger for multiple sclerosis. *Mol Immunol* 67(2 Pt B):625–35.
32. Rosa JE, et al. (2011) Incidence and prevalence of systemic sclerosis in a healthcare plan in Buenos Aires. *J Clin Rheumatol* 17(2):59–63.
33. Tamaki T, Mori S, Takehara K (1991) Epidemiological study of patients with systemic sclerosis in Tokyo. *Arch Dermatol Res* 283(6):366–71.

34. Michet Jr. CJ, McKenna CH, Elveback LR, Kaslow RA, Kurland LT (1985) Epidemiology of systemic lupus erythematosus and other connective tissue diseases in Rochester, Minnesota, 1950 through 1979. *Mayo Clin Proc* 60(2):105–13.
35. Allcock RJ, Forrest I, Corris PA, Crook PR, Griffiths ID (2004) A study of the prevalence of systemic sclerosis in northeast England. *Rheumatology* 43(5):596–602.
36. Le Guern V, et al. (2004) Prevalence of systemic sclerosis in a French multi-ethnic county. *Rheumatology* 43(9):1129–37.
37. Nietert PJ, Silverstein MD, Silver RM (2001) Hospital admissions, length of stay, charges, and in-hospital death among patients with systemic sclerosis. *J Rheumatol* 28(9):2031–37.
38. Eason RJ, Tan PL, Gow PJ (1981) Progressive systemic sclerosis in Auckland: a ten year review with emphasis on prognostic features. *Aust N Z J Med* 11(6):657–62.
39. Alamanos Y, et al. (2005) Epidemiology of systemic sclerosis in northwest Greece 1981 to 2002. *Semin Arthritis Rheum* 34(5):714–20.
40. Arnett FC, et al. (1996) Increased prevalence of systemic sclerosis in a Native American tribe in Oklahoma. Association with an Amerindian HLA haplotype. *Arthritis Rheum* 39(8):1362–70.
41. Tan FK, et al. (1999) HLA haplotypes and microsatellite polymorphisms in and around the major histocompatibility complex region in a Native American population with a high prevalence of scleroderma (systemic sclerosis). *Tissue Antigens* 53(1):74–80.
